1 **First detection of Infectious Spleen and kidney Necrosis Virus (ISKNV)**  
2 **associated with massive mortalities in farmed tilapia in Africa**

3 **Short running title:** First detection of ISKNV in farmed tilapia in Africa

4 José Gustavo Ramírez-Paredes<sup>a</sup>, Richard K. Paley<sup>bc</sup>, William Hunt<sup>a</sup>, Stephen W. Feist<sup>bc</sup>

5 David M. Stone<sup>bc</sup>, Terry Field<sup>a</sup>, David J. Haydon<sup>a</sup>, Peter A. Ziddah<sup>d</sup>, Samuel Duodu<sup>e</sup>,

6 Timothy S. Wallis<sup>a</sup>, David W. Verner -Jeffreys<sup>bc\*</sup>

7 <sup>a</sup> Ridgeway Biologicals Limited, Units 1-3 Old Station Business Park, Compton, Berkshire,  
8 England, United Kingdom

9 <sup>b</sup> Cefas Weymouth Laboratory, Weymouth, Dorset, England, United Kingdom.

10 <sup>c</sup> OIE Collaborating Centre for Emerging Aquatic Animal Diseases.

11 <sup>d</sup> Fisheries Commission, Ministry of Fisheries and Aquaculture Development, Accra, Ghana

12 <sup>e</sup> University of Ghana, Accra, Ghana

13

14 \*Corresponding author Dr D. W. Verner-Jeffreys Cefas Weymouth Laboratory, Weymouth,

15 Dorset, England, United Kingdom

16 **Abstract**

17 In late 2018, unusual patterns of very high mortality (>50% production) were reported in intensive  
18 tilapia cage culture systems across Lake Volta in Ghana. Affected fish showed darkening, erratic  
19 swimming and abdominal distension with associated ascites. Histopathological observations of  
20 tissues taken from moribund fish at different farms revealed the presence of lesions indicative of  
21 viral infection. These included haematopoietic cell nuclear and cytoplasmic pleomorphism with  
22 marginalisation of chromatin and fine granulation. Transmission electron microscopy showed  
23 tilapia cells contained conspicuous virions with typical Iridovirus morphology i.e. enveloped, with  
24 icosahedral and or polyhedral geometries and with a diameter c.160 nm. PCR confirmation and  
25 DNA sequencing identified the virions in the tissues of the diseased fish as Infectious Spleen and  
26 Kidney Necrosis Virus (ISKNV). Samples of fry and older animals were all strongly positive for  
27 the presence of the virus by qPCR. All samples tested negative for TiLV and Nodavirus by qPCR.  
28 All samples collected from farms in the year prior to the mortality event were negative for  
29 ISKNV. The results suggest that ISKNV was the cause of disease on the investigated farms and  
30 likely had a primary role in the mortality events. A common observation of coinfections with  
31 *Streptococcus agalactiae* and other tilapia bacterial pathogens further suggests that these may  
32 interact to cause severe pathology, particularly in larger fish. The present results demonstrate that  
33 there are a range of potential threats to the sustainability of tilapia aquaculture that need to be  
34 guarded against.

35 **Keywords:** Tilapia; Africa; Tilapia Viral Diseases; fish virus; Infectious Spleen and Kidney  
36 Necrosis Virus; ISKNV;

37

## 38 **Introduction**

39 The farming of tilapia species (*Oreochromis* spp.) is one of the most important sectors in  
40 aquaculture worldwide with total global production estimated at more than 6 686 000 tonnes in  
41 2016 (1). In Africa, production is still dominated by Egypt with more than 1 000 000 tonnes  
42 produced in 2017 (1). However, tilapia culture has become increasingly important in several other  
43 African countries, where it boosts the local economy and constitutes an affordable source of  
44 animal protein for human consumption.

45 In Ghana, Nile tilapia production in 2016 had reached more than 50 000 tonnes, from only 2 000  
46 tonnes per year in 2006 (2) with more than 90% of the production derived from high stocking  
47 density floating cage systems in Lake Volta. However, as production systems have intensified in  
48 the area, the industry has been increasingly affected by a range of disease issues (3, 4).

49 In 2017 (3) conducted the first comprehensive disease investigation in tilapia farmed in Lake  
50 Volta Ghana. *Streptococcus agalactiae* multilocus sequence type 261 was shown to be a major  
51 cause of mortality for farmed Nile tilapia and a range of other bacterial and parasitic pathogens  
52 including *Aeromonas* spp., *Streptococcus iniae*, *Flavobacterium columnare* and a *Myxobolus* sp.  
53 were also detected.

54 Jansen et al. (4) conducted follow up studies, including a broad-ranging epidemiological  
55 investigation and suggested that mortalities caused by bacteria in Lake Volta were not a major  
56 concern for the local economy as farmers had managed to sustain losses by increasing production  
57 of fingerlings, treatment with antibiotics and use of autogenous vaccines.

58 Historically, bacterial infections were the major threat for the health of farmed tilapia (5).  
59 However, in recent years a number of viral diseases have emerged worldwide with devastating  
60 effects for the industry(6). Tilapia Lake Virus (TiLV) is considered the main viral challenge to

61 tackle, as it has spread to many producing countries, causing high mortalities in all production  
62 stages. Although TiLV has been detected elsewhere in Africa (7), the initial study by (3),  
63 diagnostic investigations undertaken by Ridgeway Biologicals Ltd. (Ramirez *et al.* unpublished  
64 data), or the more recent survey undertaken by (4), all failed to provide any evidence of TiLV in  
65 diseased tilapia reared in Lake Volta. Up until September 2018, with the exception of the  
66 detection of a nodavirus sequence by (3), no significant association between viral agents and  
67 tilapia mortality events have been demonstrated in Ghana.

68 From September 2018 to March 2019 outbreaks of disease with very high levels of morbidity and  
69 mortality (60-90%), were experienced in both vaccinated and unvaccinated tilapia by farmers in  
70 Lake Volta. In late-September 2018, a farm located below the lower dam in the region of  
71 Asutsuare, was the first to suffer episodes of massive acute mortalities (<https://goo.gl/LmqbG2>  
72 and <https://bit.ly/2NwDEbD>). Approximately a week after the first report, a second farm located  
73 in the Akuse region (~5 km upstream of Asutsuare, but still below the lower dam) also  
74 experienced acute mortalities. By mid-October, multiple floating cage-based farms in the Dodi  
75 region (above the upper dam) reported losses of more than 10 tonnes per day  
76 <https://goo.gl/yj4oT4>. In late November, farmers that had been unaffected in the Asikuma region  
77 (downstream of Dodi but still above the upper dam) also started to suffer episodes of massive  
78 acute mortality. (**Figure 1**).

79 By the end of 2018, most tilapia farmers in Lake Volta had reported mortalities that they were not  
80 able to contain by increased production of fingerlings or treating with antibiotics (**Supplementary**  
81 **File 1**, <https://bit.ly/2KZFFuw> and <https://goo.gl/cPmpSE>). We report the results of a  
82 comprehensive disease investigation, conducted at two affected farms from two different regions  
83 of Lake Volta, to gain insights into the causes of these mortalities.

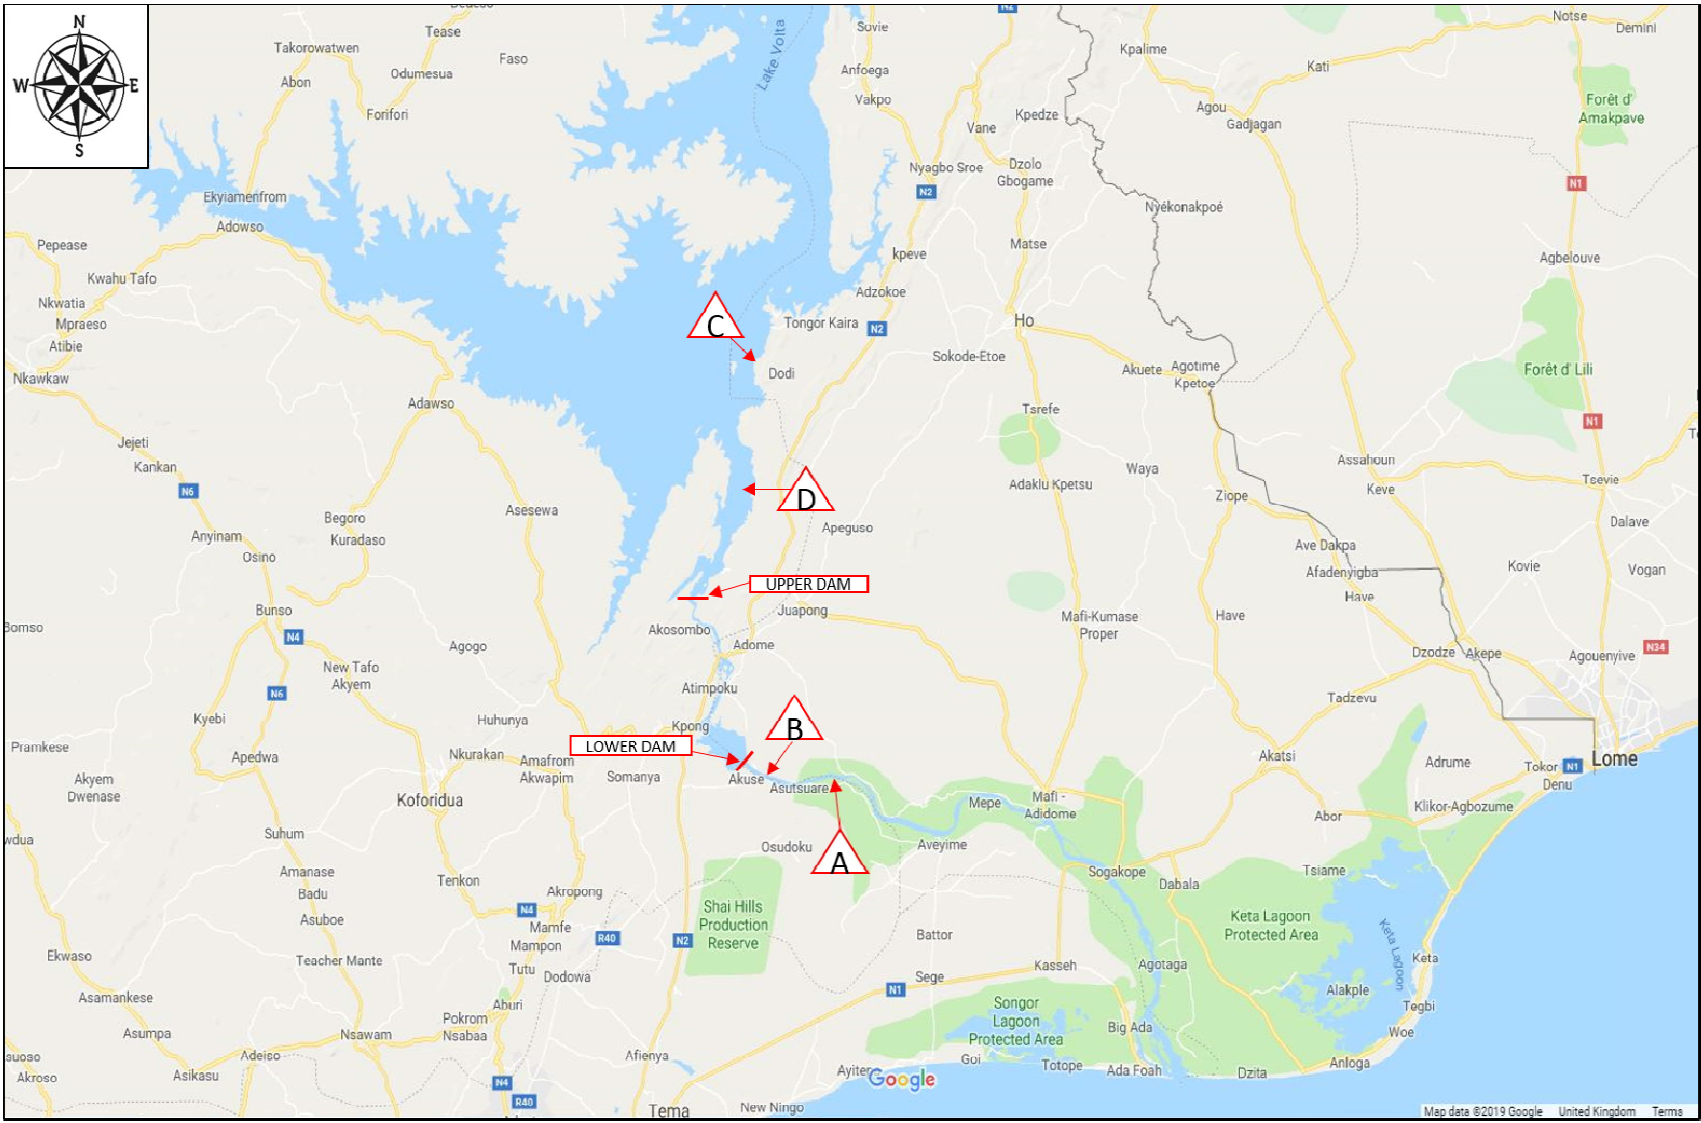

84  
85  
86

**Figure 1** Map of lower region of Lake Volta in Ghana, West Africa. Red triangles indicate the regions in chronological order (A to D) where the outbreaks of mortality occurred.

## 87 **2 Materials and Methods**

### 88 **2.1 Sampling**

89 Farm 1, a medium size (approximately 600-800 tonnes per annum production) cage culture  
90 operation on upper Lake Volta, was visited on the 18/10/18. Samples from 10 fish (average  
91 weight 200g) were taken for bacteriology. In addition five sets of samples containing liver  
92 and brain from fish from different cages were collected for molecular diagnostics as detailed  
93 in **Table 1**.

94 Farm 2, a large cage culture operation (>2000 tonnes per annum), was visited for sampling on  
95 28/11/18, 17/12/18 and 20/02/19. For the first two visits, moribund fish between 40-646g  
96 collected from cages on the main lake were sampled. In the first visit for bacteriology and  
97 virology on the second visit for virology only. For the third visit, responding to reports that  
98 they were now experiencing very heavy mortalities in their fry production units (>70%),  
99 samples of moribund fry and juveniles from both nursery cages on the main lake and from  
100 their onshore hatchery supplied with water pumped from the main lake, were analysed for  
101 virology. From this farm material was also taken for histological and molecular diagnostic  
102 investigations during the visits as detailed in **Table 1 and Supplementary File 2**.

103 All moribund fish from the visited farms were humanely euthanised with a lethal overdose of  
104 tricaine methanesulfonate 1,000 mg/g (Pharmaq, Hampshire, UK) followed by brain  
105 destruction prior to the necropsy.

### 106 **2.2 Bacteriology**

107 Samples for bacteriology were collected from the brain, liver, kidney and spleen with sterile  
108 cotton swabs and inoculated onto tryptone soya agar (TSA), Columbia blood agar (CBA),

109 Tryptone yeast extract salts agar (TYES) (Southern Group Laboratory, Corby, UK) and  
110 cystine heart agar with 2% bovine haemoglobin (CHAH) (Becton Dickinson, Oxford, UK).

111 All inoculated agar plates were incubated at 28 °C for 24-72 hours. Colonies assessed as  
112 significant based on occurrence and dominance were subcultured to purity on similar media.  
113 Pure relevant isolates were initially identified by morphology and Gram staining. The partial  
114 16S rRNA genes of the Gram negative isolates identified were PCR amplified and sequenced  
115 using the method described by (8). Gram positive cocci forming chains were screened using a  
116 *Streptococcus agalactiae* specific capsular typing multiplex PCR developed by (9). The  
117 Gram negative isolates strains confirmed as *Aeromonas* spp. based on partial 16S rRNA gene  
118 sequence analysis were further characterised based on partial *gyrB* sequencing analysis for  
119 identification at the species level as described by (10).

### 120 **2.3 Histopathology and Electron Microscopy**

121 Tissues were fixed in neutral buffered formalin (NBF) for a minimum of 24 hr before being  
122 placed in glycerol diluted 50:50 with phosphate buffered saline (PBS) for transportation to  
123 Cefas. On receipt, tissues were rinsed in 70% alcohol and placed again in NBF for a final  
124 period of fixation prior to processing using standard protocols in a vacuum infiltration  
125 processor. Tissue sections were cut at a thickness of 3-4 µm on a Finnese® microtome,  
126 mounted on glass slides and stained with haematoxylin and eosin using an automated staining  
127 protocol. Stained sections were examined for general histopathology by light microscopy  
128 (Nikon Eclipse E800). Digital images and measurements were obtained using the Lucia™  
129 Screen Measurement software system (Nikon, UK).

130 For electron microscopy, small samples of tissues fixed in NBF as above were rinsed three  
131 changes of 0.1 M sodium cacodylate buffer, followed by post fixation in 2.5% glutaraldehyde

132 in the same buffer for 1 hour prior to a second post fixation for 1 hour in 1 % osmium  
133 tetroxide in 0.1 M sodium cacodylate buffer. Subsequently, fixed tissues were dehydrated in  
134 an ascending acetone series acetone series and embedded in epoxy resin 812 (Agar Scientific  
135 pre-Mix Kit 812, Agar scientific, UK) and polymerised at 60 °C overnight. Semi-thin (1 µm)  
136 survey sections were stained with 1 % Toluidine Blue and examined by light microscope to  
137 identify areas of interest. Ultrathin sections (70-90 nm) of the targeted areas were placed on  
138 uncoated copper grids and stained with uranyl acetate and Reynold's lead citrate (Reynolds  
139 1963). Grids were examined using a JEOL JEM 1400 transmission electron microscope and  
140 digital images captured using a GATAN Erlangshen ES500W camera and Gatan Digital  
141 Micrograph™ software.

#### 142 **2.4 Molecular diagnosis (viral and bacterial detection)**

143 The samples collected for molecular diagnosis were washed twice in 750µl of sterile 1x PBS  
144 to remove the RNA-*later*® and homogenised. Total nucleic acids were extracted using  
145 nanomagnetic beads i.e. Genesig Easy DNA/RNA Extraction Kit (Primerdesign,  
146 Southampton, UK) and stored until further use.

#### 147 *Multiplex PCR for detection of Streptococcus spp.*

148 Nucleic acids extracted were used as a template on a multiplex PCR (unpublished data) to  
149 confirm the presence of *Streptococcus* spp. that had been previously reported as fish  
150 pathogens including *Streptococcus agalactiae* (11), *Streptococcus uberis* (12) and  
151 *Streptococcus dysgalactiae* (13).

#### 152 *qPCR for detection of TiLV and Nodavirus*

153 Nucleic acids were used for the detection of tilapia lake virus and nodavirus by quantitative  
154 PCR using the commercial kits: Path-TiLV-EASY and Path-Betanodavirus-EASY



155 (Primerdesign, Southampton, UK) in the platform Genesig q16® (Primerdesign,  
156 Southampton, UK) as per the protocols suggested by the manufacturer.

157 *Conventional PCR for detection of megalocytiviruses*

158 The Office International des Epizooties (OIE) reference PCR protocol for notifiable aquatic  
159 megalocytiviruses ( Red Seabream Iridoviral disease / Infection spleen and kidney necrosis  
160 virus (14, 15)) with the modification proposed by (16) was initially used, to screen the  
161 samples of fish collected from visit 2 at Farm 2. For this, genomic DNA was extracted as  
162 follows: the RNA-*later*® was removed and the tissue samples weighed. Depending on the  
163 weight of the tissue available the samples were diluted in RTL buffer (Qiagen) to provide  
164 either a 1:10 w/v or a 1:5 w/v and homogenised per fish i.e. all the organs of each fish into an  
165 individual pool using Matrix A and the FastPrep apparatus (MP Biomedicals). Following  
166 homogenisation, the samples were diluted further with RTL buffer to give a 1:60 w/v  
167 homogenate and total nucleic acid was extracted from 300 µl of the clarified sample using the  
168 RNA tissue mini kit without DNase (Qiagen) and eluted in a 60 µl volume.

169 RT was performed at 37°C for 1 h in a 20 µl volume consisting of 1× M-MLV RT reaction  
170 buffer (50 mM) Tris pH 8.3, 75 mM KCl, 10 mM DTT, 3 mM MgCl<sub>2</sub>) containing 1 mM  
171 dNTP, 100 pmol random primers, 20 U M-MLV reverse transcriptase (Promega,  
172 Southampton UK) and 4µl of the nucleic acid extracted above.

173 PCR was performed in duplicate in a 50 µl reaction volume with 2.5 µl of cDNA of total  
174 nucleic acid, 25 mM dNTPs, 1 x GoTaq® buffer (2.5 mM MgCl<sub>2</sub> solution), 5 pmol of each  
175 primer (C1105 5'-GGTTCATCGACATCTCCGCG-3' and C1106 5'-  
176 AGGTCGCTGCGCATGCCAATC-3') and 1.25 units of GoTaq® DNA polymerase  
177 (Promega). The cycling conditions were as follows: 40 temperature cycles (1 min at 95°C, 1

178 min at 55°C and 1 min at 72°C) after an initial denaturing step (5 min at 95°C) followed by a  
179 final extension step of 10 min at 72°C.

180 Amplified products were electrophoresed in a 2% (w/v) agarose/TAE (40 mM Tris-acetate,  
181 pH 7.2, 1 mM EDTA) gel containing 1.0 µg ml<sup>-1</sup> ethidium bromide at 120 v for 30 mins and  
182 viewed under UV light.

183 PCR products were excised from the gel and the DNA was extracted and purified by ethanol  
184 precipitation. Both strands of the PCR product were sequenced using the ABI PRISM Big  
185 Dye Terminator v3.1 cycle sequencing kit and the same primers used for the amplification.  
186 The forward and reverse sequences were aligned and a consensus sequence generated using  
187 the CLC software (Qiagen). Generated consensus sequences were compared with sequences  
188 from GenBank using BLASTN (17) and aligned using the MUSCLE application of the  
189 MEGA software version 6 (18).

190 In addition, the OIE recommended PCR protocol for notifiable aquatic megalocytiviruses  
191 (14) developed by (15) was used was used to screen total nucleic acids extracted from the rest  
192 of the samples fixed for viral molecular analyses.

### 193 *qPCR for detection and quantification of megalocytiviruses*

194 The amount of virus present in the samples was also investigated by qPCR. For this the  
195 homogenised tissues were subjected to total nucleic acids extraction (~20mg of each organ)  
196 using the Genesig Easy DNA/RNA Extraction Kit (Primerdesign) as described earlier. The  
197 extracted nucleic acids were tested using the commercial kit Path-ISKNV-EASY  
198 (Primerdesign, Southampton, UK) in the platform Genesig q16® (Primerdesign) as per the  
199 manufacturer instructions. This detects both red sea bream iridovirus and ISKNV variants. In

200 all cases fish were individually analysed either by pooling liver, spleen and brain or screening  
201 individual tissues.

### 202 *Retrospective analyses of archived samples by qPCR*

203 A total of 16 samples of archived tissue homogenates from 5 different farms (that included  
204 Farms 1 and 2) were retrospectively screened for ISKNV by qPCR with the commercial kit  
205 Path-ISKNV-EASY as described before. From these 7 had been collected during 2017 and  
206 the rest in March 2018 (**Supplementary File 5**). All the samples had been previously  
207 confirmed as negative for TiLV and Nodavirus using the commercial kits Path-TiLV-EASY  
208 and Path-Betanodavirus-EASY.

## 209 **3 Results**

### 210 3.1 Farm visits

211 On the first visit to Farm 2 on the 27/11/18, farm staff reported very high and ongoing  
212 mortalities (Figure 2) in fish bigger than 20g, including broodstock, but no significant losses  
213 in fingerlings. Losses reportedly peaked at about 670 crates (equating to approximately 40  
214 tonnes per day) shortly after this visit on the 2/12/2018 (**Figure 2**).

215 Losses were so severe that accurate estimation was not possible, with more than 50 additional  
216 labourers recruited locally just to remove dead and moribund fish during the peak period. By  
217 the second visit to Farm 2, losses of ongrowing fish had reportedly declined back to the  
218 background 10-20 crates per day more typically observed i.e. less than 1-2 tonnes per day  
219 (**Figure 2**).

220

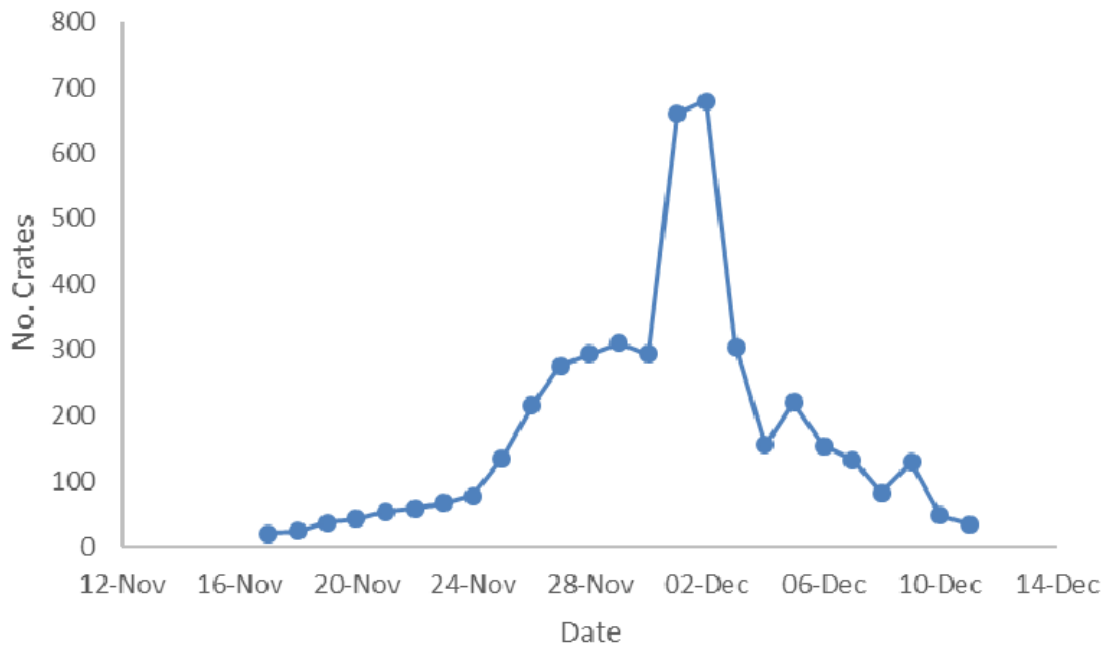

221  
222  
223  
224  
225  
226  
227

**Figure 2. Number of crates of dead/ moribund fish removed from Farm 2 during period of maximum losses.** Daily mortalities were estimated based on numbers of crates of rejected ongrowing tilapia collected each day by farm staff. Each crate typically contained approximately 60kg tilapia collected from the cages and rejected because they were either dead, moribund or displayed other adverse signs that prevented their sale.

228 During the first two visits to the farms, but particularly to Farm 2, diseased fish were  
229 observed swimming away from the school with erratic swimming i.e. on one side, in circles,  
230 lethargic, with no equilibrium, upside down etc. (**Supplementary File 3**).

231 Externally, the fish displayed a range of clinical signs, including skin nodules, frayed fins,  
232 loss of eyes, opaque eyes, loss of scales, exophthalmia, anorexia, decolouration or darkened  
233 skin, excess of mucous, skin haemorrhages and distended abdomen (**Figure 3**). At necropsy,  
234 fish from both the first visits to Farm 1 and 2 presented with marked ascites, enlarged and  
235 haemorrhagic organs including the spleen, heart, brain, gills, but most notably liver and  
236 kidney. The gastrointestinal track was empty of solids but contained transparent fluid similar  
237 to that also seen in the peritoneal cavity.

238 In contrast to the earlier visits, when Farm 2 was visited on 20/02/19, there were very high  
239 and ongoing mortalities in the fry production systems (>70%). This was both in their onshore  
240 hatchery (supplied with water pumped from the main lake) where eggs were hatched and held  
241 until the fry were approximately 20g, and in the nursery cages on the main lake to which fry  
242 had been transferred. As with the larger fish sampled, affected fry showed erratic swimming  
243 behaviour, skin haemorrhages and severe ascites as the main clinical signs (**Figure 3**).

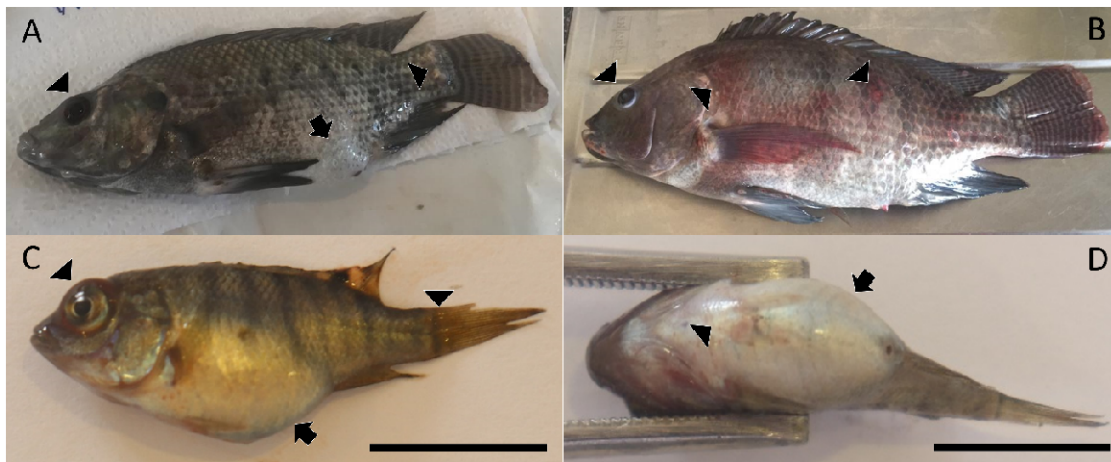

244  
245 **Figure 3 External lesions and clinical signs in diseased Nile tilapia in Lake Volta. A**  
246 **Ongrowing fish with emaciation slight ascites (arrow), endophthalmia (left arrow head) and**  
247 **skin purulent abscesses (right arrow head). B Broodstock with microphthalmia left arrow head,**  
248 **skin haemorrhages (middle arrow head) and skin ulcers (right arrow head). C juvenile with**  
249 **exophthalmia (left arrow head), ascites (arrow) and loss of scales, excess of mucus and**  
250 **haemorrhages (right arrow head). Bar = 1cm. D Ventral view of juvenile fish presenting**  
251 **severe ascites black arrow and skin haemorrhages (arrow head). Bar= 1cm.**

252

### 253 3.2 *Megalocytivirus* and bacterial infections in Farm 2 during period of high mortalities

254 Four out of the ten fish examined histologically showed mild tissue necrosis in the spleen and  
255 renal haematopoietic tissue with the presence of large numbers of cells showing relative  
256 eosinophilia cytoplasmic and nuclear pleomorphism with margination of chromatin in some  
257 affected nuclei suggestive of a viral infection diffused throughout the tissue (**Figure 4**).

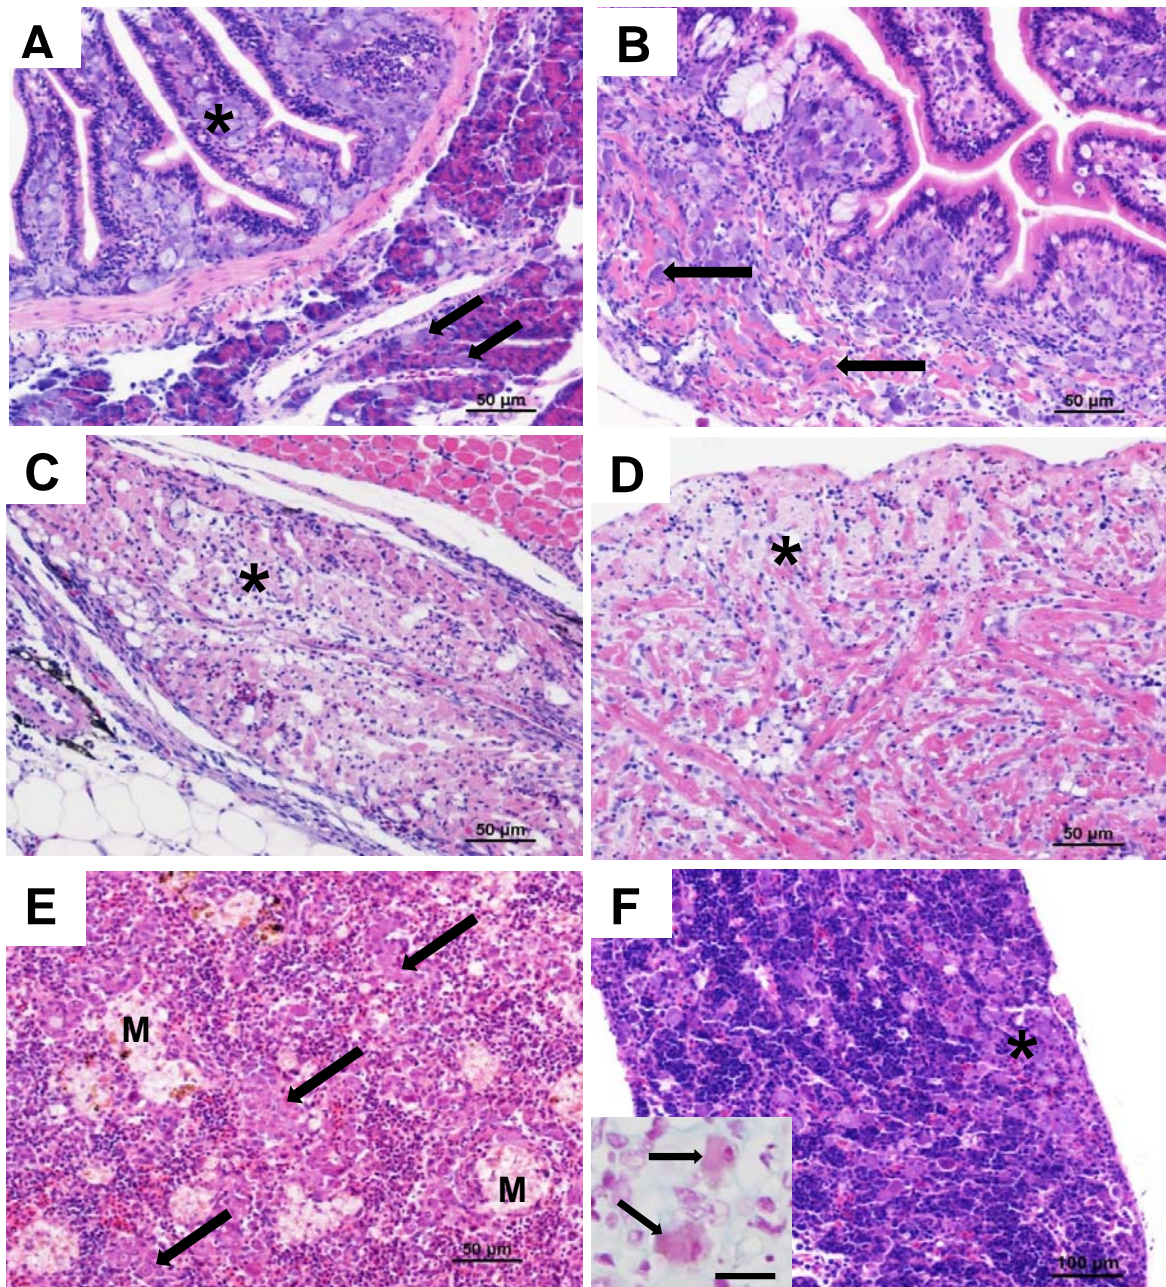

258 **Figure 4 Histopathological cross sections of tissues from diseased Nile tilapia in Lake Volta.** All  
259 sections stained with H&E unless otherwise stated. **A.** Section through the intestine of an infected fry  
260 showing the presence of large numbers of megalocytes in the lamina propria (\*) but not affecting the  
261 mucosa or underlying muscularis. Note the presence of isolated megalocytes in the pancreatic acinar  
262 tissue (arrows). Bar = 50µm. **B.** Same fish as in A, showing infiltration and disruption of the  
263 muscularis associated with the presence of megalocytes (arrows). Bar=50 µm. **C.** Pseudobranch  
264 showing extensive necrosis (\*). Bar=50µm. **D.** Heart showing necrosis of the ventricular muscle (\*),  
265 particularly in the peripheral regions associated with inflammation. Bar=50µm. **E.** Spleen from a fish  
266 from Farm 2 during a mortality episode. Affected cells show pronounced eosinophilia and are  
267 distributed throughout the section (\*). Numerous vacuolated macrophage aggregates are also present  
268 (M). Bar = 50µm. **F.** Pronephros showing extensive distribution of megalocytes without associated  
269 tissue necrosis (\*). Bar=100µm. Inset shows pale staining of DNA in the cytoplasm of affected cells  
270 (arrows). Feulgen stain. Bar=25µm.

271 The ultrastructure of affected cells revealed the presence of conspicuous viral particles. Some  
272 cells showed the presence of numerous diffusely spread virions within the hypertrophied  
273 nucleus of affected cells, which also showed degradation of the nuclear membrane (**Figure**  
274 **5**). Virions were approximately 160 nm in diameter (**Figure 5D**). Virion morphology  
275 showing icosahedral symmetry with an external double membrane and internal core was  
276 consistent with that of viruses from the genus *Megalocytivirus*. In other cases, the nucleus of  
277 affected cells appeared condensed and densely stained in histological and resin sections.  
278 TEM showed that in these cases the nucleus was tightly packed with virions in various stages  
279 of maturation and with some evidence of formation of ‘arrays’ (**Figure 5**). In two of these  
280 cases, a concomitant Gram +ve bacterial infection was also present in the gill and liver.  
281 Incidental findings of gill parasites, myxozoan cysts and monogeneans, both present in low  
282 numbers as well as low grade epitheliocystis were observed. The brain of a single fish  
283 harboured small cysts containing necrotic debris. Gram and Ziehl-Neelsen staining did not  
284 demonstrate the presence of bacteria. Other tissues appeared normal. For the set of samples  
285 collected at the height of the mortalities from Farm 2 on 28/11/18, *Aeromonas jandaei*,  
286 *Aeromonas veronii* (from skin), *Streptococcus agalactiae* capsular type Ib biotype and  
287 *Edwardsiella tarda* (from liver and kidney) were recovered.

### 288 *3.3 PCR and sequence confirmation of Megalocytivirus infection*

289 Within the 7 individuals collected from Farm 2 on the second visit that were analysed with  
290 the protocol proposed by (16), a single fish (fish 1) was clearly positive by PCR for  
291 RSIV/ISKN and a second very weak product of the correct size was also seen in tissues from  
292 Fish 6 (**Supplementary File 4**) The consensus sequence generated from the PCR product  
293 from Fish 1 was confirmed as ISKNV sharing 100% nucleotide identity with ISKNV

294 accession no [AF371960.1](https://doi.org/10.1101/680538). In the phylogenetic analysis the sequence was assigned to the  
295 same lineage as the bulk of the ISKNV sequences (**Figure 6**).

296 The samples collected from Farm 1 and Farm 2 at the height of the mortalities were found to  
297 be strongly positive when they were retrospectively tested using the (14, 15) recommended  
298 PCR method.

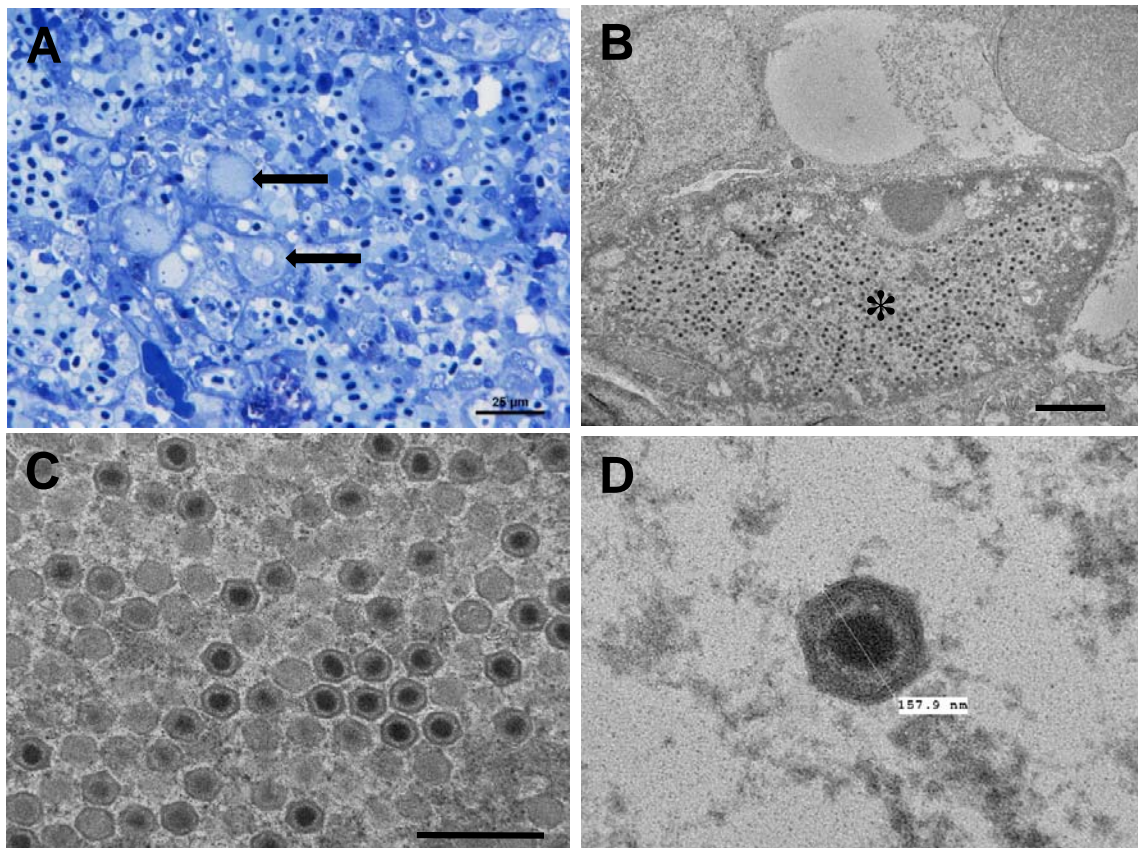

299 **Figure 5 Micrographs of the kidney of diseased Nile tilapia in Lake Volta. A** Semithin  
300 section of affected renal tissue showing characteristic cellular hypertrophy (black arrows).  
301 Toluidine Blue stain. Scale bar = 25μm. **B.** Electron micrograph of an individual infected cell  
302 with numerous viral particles (\*). Adjacent cells appear uninfected. Scale bar = 2μm. **C.**  
303 Numerous lightly stained developing virions with mature virions. The outer membranes and  
304 central electron lucent core are clearly visible. Scale bar = 500nm. **D.** Mature icosahedral  
305 virion showing detail of the outer capsid and inner membrane with central electron lucent  
306 core.

307  
308  
309  
310  
311



312

313 *3.4 qPCR results for megalocytivirus from ongrowing tilapia samples*

314 The qPCR results confirmed that all the fish sampled from Farm 1 in the Akuse region were  
315 positive for megalocytivirus. Also, as expected, the samples collected from the first Farm 2  
316 visit during the peak of mortality (28/11/18), were also positive and presented the highest  
317 viral titres in grow out fish with some containing over  $3 \times 10^6$  copies per sample reaction. In  
318 contrast, the samples collected from grow out fish during the second visit to Farm 2 had  
319 much lower viral copy numbers.

320 All the archived samples collected in 2017 and March 2018 were negative for ISKNV, when  
321 tested by qPCR (**Supplementary File 5**).

322 *3.5 Fry samples had characteristic megalocytivirus pathology and high copy numbers of*  
323 *virus*

324 All the fry samples collected from Farm 2 on 20/02/19, when there were reportedly very high  
325 (>90%) losses in that part of their system, were positive for ISKNV by qPCR and these  
326 presented the highest titres in the study with some containing up to  $1.5 \times 10^7$  copies per  
327 sample reaction (**Table 1**). All fry showed moderate to marked histological and pathological  
328 features of infection with *megalocytivirus*. Splenic tissues were necrotic and associated with  
329 the presence of megalocytes characterised by light sometimes granular cytoplasmic  
330 basophilia and hypertrophied nuclei. Kidney also showed the presence of megalocytes but  
331 usually with only mild cellular necrosis. The lamina propria in the intestine of a single fish  
332 was packed with megalocytes (**Figure 4**), although necrosis appeared to be absent and the  
333 epithelial layer remained intact. Gills showed only minimal focal necrosis, usually affecting  
334 the underlying connective tissues. In some fish the choroidal rete was affected with mild  
335 necrosis and variable numbers of megalocytes and most fish showed mild myositis with few

336 megalocytes in the skeletal muscle. However, a single fish showed extensive inflammation  
337 and myofibrillar necrosis (**Figure 4**). Connective tissues of the head and in particular around  
338 the pharyngeal teeth were often infiltrated with megalocytes. Brain and spinal cord appeared  
339 normal. Liver samples were not examined as they were used for virus quantification.

340

### 341 3.6 Other pathological observations

342 *Megalocytivirus* -like pathology was not observed in any of the samples taken from the  
343 second visit to Farm 2, two weeks after the peak of mortalities had passed. As with the  
344 samples taken at the first visit, there was evidence of bacterial infection in some individuals,  
345 particularly fish 5, had marked bacterial infection of the spleen, liver and brain (meningitis).  
346 All the samples were positive for the presence of *Streptococcus agalactiae* and negative for  
347 *Streptococcus uberis* and *Streptococcus dysgalactiae* by PCR (**Supplementary File 6**).

348 A range of different potential bacterial species, including *Aeromonas jandaei* and  
349 *Plesiomonas shigelloides* were recovered from fish from Farm 1 (**Table 1**), but not as pure  
350 growths or high quantities, suggesting they had a limited role in observed disease in these  
351 animals.

352 All the samples from Farm 1 and Farm 2 tested for TiLV and from Farm 2 for nodavirus by  
353 qPCR were all negative (**Table 1 and Supplementary File 4**).

354

355 The results for all the individual fish tested are shown in Supplementary File 2.



Table 1 Summary of sampling and results

| Sampling date & Farm  | No. of Fish and size | Farm observations and ‡clinical signs                                                                                                  | Bacteriology                                                                                                                                                          | Histopathology                                                                                      | Virology Results <sup>¥</sup><br>[ ] – qPCR <sub>RSIV/ISKNV</sub> copy number/sample reaction range                                                                                                                                            |
|-----------------------|----------------------|----------------------------------------------------------------------------------------------------------------------------------------|-----------------------------------------------------------------------------------------------------------------------------------------------------------------------|-----------------------------------------------------------------------------------------------------|------------------------------------------------------------------------------------------------------------------------------------------------------------------------------------------------------------------------------------------------|
| 18/10/2018<br>†Farm 1 | n=5; 100-300g        | Wide scale ongoing mortalities in on growing fish in cages.                                                                            | <i>Aeromonas veronii</i> ;<br><i>Aeromonas jandaei</i> ;<br><i>Plesiomonas shigelloides</i> ;<br><i>Chryseobacterium sp</i> ;<br><i>Acinetobacter johnsonii</i> ;     | Not done                                                                                            | *qPCR <sub>TiLV</sub> 5/5 -ve<br>*cPCR <sub>a</sub> ISKNV 4/5 +ve<br>*qPCR <sub>RSIV/ISKNV</sub> 5/5 +ve<br>[7.5 x 10 <sup>1</sup> – 4.60 x 10 <sup>5</sup> ]                                                                                  |
| 28/11/2018<br>†Farm 2 | n=14; 74-401g        | Wide scale ongoing mortalities in on growing fish in cages ( <b>Figure 2</b> ). On shore fry production unit: no unusual mortalities.  | <i>Aeromonas veronii</i> ;<br><i>Aeromonas jandaei</i> ;<br><i>Streptococcus agalactiae</i> capsular type Ib biotype 2 (non-haemolytic);<br><i>Edwardsiella tarda</i> | Evidence of Gram negative and Gram positive bacterial and viral# infection (including in same fish) | qPCR <sub>TiLV</sub> 14/14 -ve<br>qPCR <sub>NODA</sub> 14/14 -ve<br>*cPCR <sub>a</sub> ISKNV 12/14 +ve<br>*qPCR <sub>RSIV/ISKNV</sub> 14/14 +ve<br>[2.48 x 10 <sup>1</sup> - 3.3 x 10 <sup>6</sup> ]                                           |
| 17/12/2018<br>†Farm 2 | n=7; 40-646g         | Much lower mortalities in on growing fish in cages than previous sampling visit. On shore fry production unit: no unusual mortalities. | Not done                                                                                                                                                              | Evidence of bacterial infection but not of viral infection                                          | qPCR <sub>TiLV</sub> 7/7 -ve<br>qPCR <sub>NODA</sub> 7/7 -ve<br><b>cPCR<sub>b</sub> RSIV/ISKNV 1/7 +ve</b><br><b>megalocytivirus, sequence = ISKNV</b><br>*qPCR <sub>RSIV/ISKNV</sub> 6/7 +ve<br>[1 x 10 <sup>0</sup> - 24 x 10 <sup>0</sup> ] |
| 20/02/2019<br>†Farm 2 | n=14; 6-9 cms        | Limited mortalities in in on growing fish in cages. Very severe mortalities in on shore fry production unit.                           | Not done                                                                                                                                                              | Very severe virus-associated pathology (in tissue samples from all fish).                           | qPCR <sub>TiLV</sub> not done<br>qPCR <sub>NODA</sub> not done<br>cPCR <sub>a</sub> ISKNV 7/7 +ve<br>qPCR <sub>RSIV/ISKNV</sub> 13/13 +ve<br>[5.1 x 10 <sup>5</sup> – 1.51 x 10 <sup>7</sup> ]                                                 |

357 † Farm 1: approx. 800 tonnes production per year cage unit on lake; Farm 2: approx. 2000 tonnes per year production on growing cage culture on lake and fry unit on land  
358 supplied with water pumped from lake.

359 ‡ All moribund fish, including fry, presented similar signs: erratic swimming, lethargy, ascites, swollen, dark spleen, haemorrhagic livers and other organs.

360 # Haematopoietic cell nuclear and cytoplasmic pleomorphism with marginalisation of chromatin and fine granulation.

361 ¥ qPCR<sub>TiLV</sub>, qPCR<sub>NODA</sub>, qPCR<sub>RSIV/ISKNV</sub>: results of qPCR testing for tilapia lake virus, nodavirus and ISKNV respectively. cPCR<sub>a</sub> & cPCR<sub>b</sub> : conventional  
362 PCR using OIE recommended protocols by Kurita et al., 1998 (a) (15) and Rimmer et al., 2012 (b) (16) protocols, results in bold represent index finding, \*represents  
363 retrospective testing post index finding.

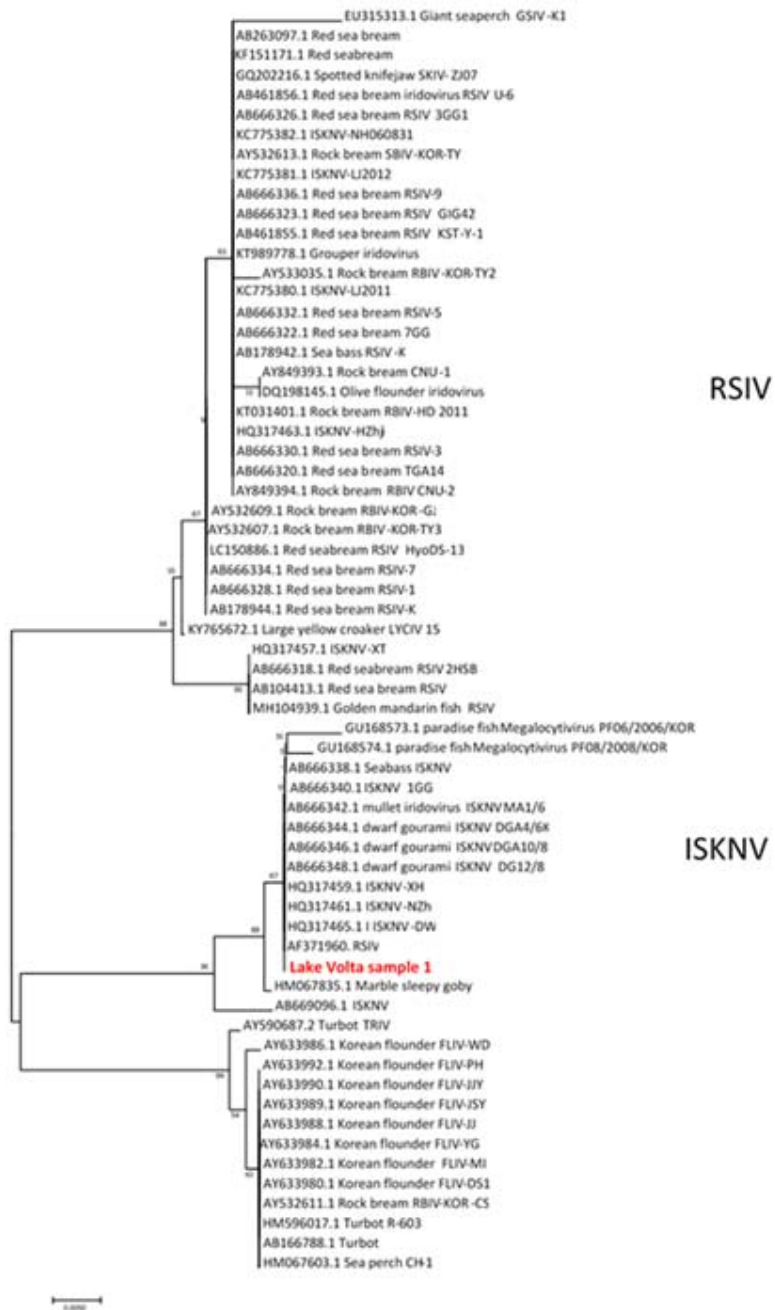

364  
 365 **Figure 6 N-J tree showing the genetic relationship of partial MCP sequence from LV#1**  
 366 **to a range of RSIV, ISKNV and related Megalocytiviruses. The GeneBank accession**  
 367 **numbers and the host species are included where available.**

#### 368 **4 Discussion**

369 The results suggest ISKNV had a significant role in the high mortalities experienced by the  
370 two farms that were investigated. Fish sampled from the second farm at the height of the  
371 disease outbreak showed severe clinical and pathological signs typically associated with  
372 infection by the virus (including visualisation of distinctive megalocytes with characteristic  
373 virions). Both, these fish and those sampled earlier from Farm 2, had extremely high copy  
374 numbers of RSIV/ISKNV *Megalocytivirus*-like virions and ISKNV was confirmed by gene  
375 sequencing.

376 Although it cannot be confirmed, without testing fish recovered from a range of the other  
377 affected farms, the results would be consistent with a recent introduction of the virus onto one  
378 or more farms prior to October 2018, that then extended upstream of the dam to other farms  
379 resulting in the unusual, widespread and significant mortalities observed. Firstly, there were  
380 no observations of typical ISKNV-associated pathology in any previous disease  
381 investigations, on the affected or other farms. Secondly, the limited PCR screening in this  
382 study of archived samples of diseased tilapia recovered from before the major mortality event  
383 including both farms, were all negative. Moreover, (3) also screened for the presence of  
384 RSIV/ISKNV by PCR in 2016, including samples from the affected farms, without detecting  
385 the virus, or associated pathology.

386 Iridoviruses are large icosahedral cytoplasmic double-stranded DNA viruses, which can  
387 infect a wide range of hosts, including invertebrates and poikilothermic vertebrates. The  
388 family *Iridoviridae* includes five genera: *Iridovirus*, *Chloriridovirus*, *Ranavirus*,  
389 *Lymphocystivirus* and *Megalocytivirus* (19). Fish pathogenic iridoviruses are representatives  
390 of *Ranavirus*, *Lymphocystivirus* and *Megalocytivirus* genera (20, 21). Infectious spleen and  
391 kidney necrosis virus (ISKNV), is a member of the genus *Megalocytivirus* (22), and causes

392 disease in a range of freshwater and marine fish species (Subramaniam, Shariff, Omar, &  
393 Hair-Bejo, 2012; Whittington, Becker, & Dennis, 2010). ISKNV is closely related to red sea  
394 bream iridovirus and both viruses are listed by the OIE as notifiable pathogens (14).  
395 Although tilapia is not listed as a susceptible species by the OIE at present (14), recent  
396 reports from the USA (23) and Thailand (24) suggest that it is a susceptible species likely to  
397 suffer significant mortality. The change in the known host range of virus needs to be  
398 communicated to the international community to prevent future transboundary spread through  
399 movement of infected tilapia.

400 It was interesting to note that many of the ISKNV positive fish were actively co-infected with  
401 *Streptococcus agalactiae* and other bacterial pathogens, presenting severe bacteraemia /  
402 meningitis, as well as ISKNV-associated pathology. The high mortalities on the farms in the  
403 larger on-growing fish may well have been exacerbated by these coinfections.

404 Although the mortalities were initially confined to on-growing fish in cage culture systems,  
405 the later observations of very high ISKNV associated mortalities in fry shows the virus likely  
406 affects all life stages. As fry are often reared in onshore facilities below the dam and then  
407 translocated to on-growing cages on the main lake, this may have been one of the routes that  
408 disease was rapidly spread after it first emerged. Anecdotally, at the time of writing, farmers  
409 on the sites visited report that mortalities in on-growing facilities have declined, while fry  
410 production continues to be badly affected. It is possible that surviving fry have been exposed  
411 to the virus and then protected against subsequent exposure. This suggests that immunisation  
412 of fry, or use of previously exposed individuals, could represent a practical disease  
413 management strategy. Vaccination as a control strategy may be used to control red sea bream  
414 iridiodovirus (25, 26) and there are also encouraging reports of its potential effectiveness for  
415 protection against ISKNV in other fish species (27).

416 Outbreaks of disease that cause significant morbidity and/or mortalities in an aquaculture  
417 operation is always a major concern. This is exacerbated when this appears to represent the  
418 incursion of a new agent into a system, or region (country or zone in a country) which has not  
419 previously been affected. A stark example of this is the epidemic of infectious salmon  
420 anaemia virus (ISAV) which reduced production by three quarters and resulted in severe  
421 economic and social crisis in the developing Chilean Atlantic salmon industry between 2007  
422 and 2010 (28–30).

423 The Ghanaian authorities have for some time been concerned that the, to date, successful,  
424 expansion of its industry on Lake Volta may be affected by such disease incursions. Partly for  
425 this reason, and also to safeguard the genetic integrity of Lake Volta Nile tilapia strains, they  
426 have tried to limit the culture to locally reared Nile tilapia stocks. However genetic testing by  
427 the Ghanaian Fisheries Commission (Ziddah *et al.*, Unpublished Observations) showed that  
428 fish on some of the farms on Lake Volta were likely of imported GIFT strain origin (31) or  
429 hybrids of GIFT and indigenous strains.

430 If farmers have been illegally sourcing broodstock from Asia and other areas, that would be  
431 an ideal method of translocating pathogens from one region to another. It should be noted  
432 though that ISKNV has also been detected in internationally traded freshwater ornamental  
433 species, theoretically posing another possible introduction route (32)

434 It is very possible that this is not the first time disease introduction has taken place in Lake  
435 Volta Ghana. The study by (3) showed that outbreaks of *S. agalactiae* investigated in 2016  
436 were all caused by genetically indistinguishable isolates of ST 261, with closest genetic  
437 identity to Asian isolates. Discussions with affected farmers at the time suggested, that *S.*  
438 *agalactiae* associated mortalities were a relatively recent phenomenon, although the disease  
439 is now clearly endemic to all the areas in the Volta area. Other studies have shown that *S.*



440 *agalactiae* ST261 has likely been translocated around the world in association with farmed  
441 tilapia (33).

442 Although most attention to date has focussed on the emergence and spread of TiLV within  
443 the tilapia industry world-wide, these results also demonstrate that there is a range of other  
444 potential threats to the sustainability of tilapia aquaculture.

#### 445 **Conclusion**

446 This is the first report of Infectious Spleen and Kidney Necrosis Virus (ISKNV) in farmed  
447 tilapia in Africa. ISKNV was found in co-infection with *Streptococcus agalactiae* and other  
448 bacterial pathogens in Lake Volta, Ghana. The correlations seen between the mortality  
449 events, histopathology and viral loads in the tissues suggest that ISKNV was a major cause of  
450 mortalities during the outbreaks. In general, the results support continued efforts to improve  
451 the biosecurity of the industry in Ghana. There is a clear need to strengthen domestic  
452 capability to rapidly diagnose and control emerging disease threats caused by ISKNV and  
453 other pathogens. Further work is also needed to map the distribution of the virus and its  
454 impact, including potential effects on wild fish species, and to implement practical control  
455 strategies.

#### 456 **Acknowledgements**

457 The farmers involved in the investigation are thanked for their support and provision of  
458 information. Support from Defra (contracts FB002 and FX001 for the OIE Collaborating  
459 Centre for Emerging Aquatic Animal Diseases) is gratefully acknowledged.

460

461

462

463 **References**

464 1. FAO. 2018. The State of World Fisheries and Aquaculture 2018 - Meeting the  
465 sustainable development goals.

466 2. FAO. 2016. The State of World Fisheries and Aquaculture. Contributing to food  
467 security and nutrition for all. Rome.

468 3. Verner-Jeffreys D, Wallis T, Cano I, Ryder D, Hayden D, Domozero J, Dontwi J,  
469 Field T, Adjei-Boteng D, Wood G, Bean T, Feis S. 2018. *Streptococcus agalactiae* Multi  
470 Locus Sequence Type 261 is associated with mortalities in the emerging Ghanaian tilapia  
471 industry. J Fish Dis 41:157–179.

472 4. Jansen MD, Cudjoe K, Brun E. 2018. Investigation of tilapia mortality in Ghana.

473 5. Plumb JA, Hanson LA. 2011. Tilapia bacterial diseases, p. 445–463. In Plum, JA,  
474 Hanson, LA (eds.), Health Maintenance and Principle Microbial Diseases of Cultured Fishes,  
475 Third edition. Blackwell Publishing Ltd, Iowa.

476 6. Machimbirike VI, Jansen MD, Senapin S, Khunrae P, Rattanarojpong T, Dong HT.  
477 2019. Viral infections in tilapines: More than just tilapia lake virus. Aquaculture 503:508–  
478 518.

479 7. Hounmanou YMG, Mdegela RH, Dougnon T V., Achoh ME, Mhongole OJ,  
480 Agadjihouèdé H, Gangbè L, Dalsgaard A. 2018. Tilapia lake virus threatens tilapines farming  
481 and food security: Socio-economic challenges and preventive measures in Sub-Saharan  
482 Africa. Aquaculture 493:123–129.

- 483 8. Klindworth A, Pruesse E, Schweer T, Peplies J, Quast C, Horn M, Glöckner FO.  
484 2013. Evaluation of general 16S ribosomal RNA gene PCR primers for classical and next-  
485 generation sequencing-based diversity studies. *Nucleic Acids Res* 41:e1.
- 486 9. Shoemaker CA, Xu DH, Garcia JC, Lafrentz BR. 2017. Capsular typing of  
487 *Streptococcus agalactiae* (Lancefield group B streptococci) from fish using multiplex PCR  
488 and serotyping. *Bull Eur Assoc Fish Pathol* 37:190–197.
- 489 10. Yáñez MA, Catalán V, Apráiz D, Figueras MJ, Martínez-Murcia AJ. 2013.  
490 Phylogenetic analysis of members of the genus *Aeromonas* based on *gyrB* gene sequences.  
491 *Int J Syst Evol Microbiol* 53:875–883.
- 492 11. Delannoy CM, Crumlish M, Fontaine MC, Pollock J, Foster G, Dagleish MP,  
493 Turnbull JF, Zadoks RN. 2013. Human *Streptococcus agalactiae* strains in aquatic mammals  
494 and fish. *BMC Microbiol* 13:41.
- 495 12. Luo X, Fu X, Liao G, Chang O, Huang Z, Li N. 2017. Isolation, pathogenicity and  
496 characterization of a novel bacterial pathogen *Streptococcus uberis* from diseased mandarin  
497 fish *Siniperca chuatsi*. *Microb Pathog* 107:380–389.
- 498 13. Abdelsalam M, Asheg A, Eissa AE. 2013. *Streptococcus dysgalactiae*: An emerging  
499 pathogen of fishes and mammals. *Int J Vet Sci Med* 1:1–6.
- 500 14. World Organisation for Animal Health OIE. 2018. Chapter 2.3.8 Red sea bream  
501 iridoviral disease *Manual of Diagnostic Tests for Aquatic Animals*. OIE, Paris.
- 502 15. Kurita J, Nakajima K, Hirono I, Aoki T. 1998. Polymerase chain reaction (PCR)  
503 amplification of DNA of red sea bream iridovirus (RSIV). *Fish Pathol* 33:17–23.

- 504 16. Rimmer, A. E., Becker JA, Tweedie A, Whittington RJ. 2012. 2012 Development of a  
505 quantitative polymerase chain reaction (qPCR) for the detection of dwarf gourami iridovirus  
506 (DGIV) and other Megalocytiviruses and comparison with the Office International des  
507 Epizooties reference PCR protocol. *Aquaculture* 358-359:15. *Aquaculture* 358–359:155–163.
- 508 17. Altschul SF, Madden TL, Schäffer AA, Zhang J, Zhang Z, Miller W, Lipman DJ.  
509 1997. Gapped BLAST and PSI-BLAST: A new generation of protein database search  
510 programs. *Nucleic Acids Res* 25:3389–3402.
- 511 18. Tamura K, Stecher G, Peterson D, Filipski A, Kumar S. 2013. MEGA6: Molecular  
512 Evolutionary Genetics Analysis version 6.0. *Mol Biol Evol* 30:2725–9.
- 513 19. Jancovich JK, Chinchar VG, Hyatt A, Miyazaki T, Williams T, Zhang QY. 2012.  
514 Family Iridoviridae., p. 193–210. In King, AMQ, Adams, MJ, Carstens, EB, Lefkowitz. E.J.  
515 (eds.), *Virus Taxonomy: Ninth Report of the International Committee on Taxonomy of*  
516 *Viruses*. Elsevier Academic Press, San Diego, CA.
- 517 20. Subramaniam K, Shariff M, Omar AR, Hair-Bejo M. 2012. Megalocytivirus infection  
518 in fish. *Rev Aquac* 4:221–233.
- 519 21. Whittington RJ, Becker JA, Dennis MM. 2010. Iridovirus infections in finfish-critical  
520 review with emphasis on ranaviruses. *J Fish Dis* 33:95–122.
- 521 22. Kurita J, Nakajima K. 2012. Megalocytiviruses. *Viruses* 4:521–538.
- 522 23. Subramaniam K, Gotesman M, Smith CE, Steckler NK, Kelley KL, Groff JM,  
523 Waltzek TB. 2016. Megalocytivirus infection in cultured Nile tilapia *Oreochromis niloticus*.  
524 *Dis Aquat Organ* 119:253–258.

- 525 24. Suebsing R, Pradeep PJ, Jitrakorn S, Sirithammajak S, Kampeera J, Turner WA,  
526 Saksmerprome V, Withyachumnarnkul B, Kiatpathomchai W. 2016. Detection of natural  
527 infection of infectious spleen and kidney necrosis virus in farmed tilapia by hydroxynaphthol  
528 blue-loop-mediated isothermal amplification assay. *J Appl Microbiol* 121:55–67.
- 529 25. Shimmoto H, Kawai K, Ikawa T, Oshima SI. 2010. Protection of red sea bream  
530 *Pagrus major* against red sea bream iridovirus infection by vaccination with a recombinant  
531 viral protein. *Microbiol Immunol* 54:135–142.
- 532 26. Nakajima K, Maeno Y, Honda A, Yokoyama K, Tooriyama T, Manabe S. 1999.  
533 Effectiveness of a vaccine against red sea bream iridoviral disease in a field trial test. *Dis*  
534 *Aquat Organ* 36:73–75.
- 535 27. Dong Y, Weng S, He J, Dong C. 2013. Field trial tests of FKC vaccines against RSIV  
536 genotype Megalocytivirus in cage-cultured mandarin fish (*Siniperca chuatsi*) in an inland  
537 reservoir. *Fish Shellfish Immunol* 35:1598–1603.
- 538 28. Vike S, Stian Nylund S, Nylund A. 2009. ISA virus in Chile: evidence of vertical  
539 transmission. *Arch Virol* 154:1–8.
- 540 29. Mardones FO, Martinez-Lopez B, Valdes-Donoso P, Carpenter TE, Perez AM. 2014.  
541 The role of fish movements and the spread of infectious salmon anemia virus (ISAV) in  
542 Chile, 2007-2009. *Prev Vet Med* 114:37–46.
- 543 30. Godoy MG, Aedo A, Kibenge MJT, Groman DB, Yason C V., Grothusen H,  
544 Lisperguer A, Calbucura M, Avendaño F, Imilán M, Jarpa M, Kibenge FSB. 2008. First  
545 detection, isolation and molecular characterization of infectious salmon anaemia virus  
546 associated with clinical disease in farmed Atlantic salmon (*Salmo salar*) in Chile. *BMC Vet*  
547 *Res* 4:28.

- 548 31. Ponzoni RW, Nguyen NH, Khaw HL, Hamzah A, Bakar KRA, Yee HY. 2011.  
549 Genetic improvement of Nile tilapia (*Oreochromis niloticus*) with special reference to the  
550 work conducted by the WorldFish Center with the GIFT strain. *Rev Aquac* 3:27–41.
- 551 32. Jung-Schroers V, Adamek M, Wohlsein P, Wolter J, Wedekind H, Steinhagen D.  
552 2016. First outbreak of an infection with infectious spleen and kidney necrosis virus (ISKNV)  
553 in ornamental fish in Germany. *Dis Aquat Organ* 119:239–244.
- 554 33. Kawasaki M, Delamare-Deboutteville J, Bowater RO, Walker MJ, Beatson S, Ben  
555 Zakour NL, Barnes AC. 2018. Microevolution of *Streptococcus agalactiae* ST-261 from  
556 Australia indicates dissemination via imported tilapia and ongoing adaptation to marine hosts  
557 or environment. *Appl Environ Microbiol* 84:e00859-1.
