1 **First detection of Infectious Spleen and kidney Necrosis Virus (ISKNV)**  
2 **associated with massive mortalities in farmed tilapia in Africa**

3 **Short running title:** First detection of ISKNV in farmed tilapia in Africa

4 José Gustavo Ramírez-Paredes<sup>a†</sup>, Richard K. Paley<sup>bc†</sup>, William Hunt<sup>a</sup>, Stephen W. Feist<sup>bc</sup>  
5 David M. Stone<sup>bc</sup>, Terence R. Field<sup>a</sup>, David J. Haydon<sup>a</sup>, Peter A. Ziddah<sup>d</sup>, Mary Nkansah<sup>d</sup>,  
6 Emanuel K. Pecku<sup>e</sup>, Joseph A. Awuni<sup>e</sup>, James Guildler<sup>bc</sup>, Joshua Gray<sup>b</sup>, Samuel Duodu<sup>f</sup>,  
7 Timothy S. Wallis<sup>a</sup>, David W. Verner-Jeffreys<sup>bc\*</sup>

8 <sup>a</sup>Ridgeway Biologicals Limited a Ceva Santé Company, Units 1-3 Old Station Business Park,  
9 Compton, Berkshire, England, United Kingdom

10 <sup>b</sup>Cefas Weymouth Laboratory, Weymouth, Dorset, England, United Kingdom.

11 <sup>c</sup>OIE Collaborating Centre for Emerging Aquatic Animal Diseases.

12 <sup>d</sup>Fisheries Commission, Ministry of Fisheries and Aquaculture Development, Accra, Ghana

13 <sup>e</sup>Veterinary Services Directorate, Accra, Ghana

14 <sup>f</sup>University of Ghana, Accra, Ghana

15 <sup>†</sup>Both authors contributed equally to this study

16 <sup>\*</sup>Corresponding author Dr D. W. Verner-Jeffreys Cefas Weymouth Laboratory, Weymouth,  
17 Dorset, England, United Kingdom

## 18 **Summary**

19 In late 2018, unusual patterns of very high mortality (>50% production) were reported in intensive  
20 tilapia cage culture systems across Lake Volta in Ghana. Samples of fish and fry were collected  
21 and analysed from two affected farms between October 2018 and February 2019. Affected fish  
22 showed darkening, erratic swimming and abdominal distension with associated ascites.  
23 Histopathological observations of tissues taken from moribund fish at different farms revealed  
24 lesions indicative of viral infection. These included haematopoietic cell nuclear and cytoplasmic  
25 pleomorphism with marginalisation of chromatin and fine granulation. Transmission electron  
26 microscopy showed cells contained conspicuous virions with typical Iridovirus morphology i.e.  
27 enveloped, with icosahedral and or polyhedral geometries and with a diameter c.160 nm. PCR  
28 confirmation and DNA sequencing identified the virions as Infectious Spleen and Kidney  
29 Necrosis Virus (ISKNV). Samples of fry and older animals were all strongly positive for the  
30 presence of the virus by qPCR. All samples tested negative for TiLV and Nodavirus by qPCR. All  
31 samples collected from farms prior to the mortality event were negative for ISKNV. Follow up  
32 testing of fish and fry sampled from 5 additional sites in July 2019 showed all farms had fish that  
33 were PCR positive for ISKNV, whether there was active disease on the farm or not, demonstrating  
34 the disease was endemic to farms all over Lake Volta by that point. The results suggest that  
35 ISKNV was the cause of disease on the investigated farms and likely had a primary role in the  
36 mortality events. A common observation of coinfections with *Streptococcus agalactiae* and other  
37 tilapia bacterial pathogens further suggests that these may interact to cause severe pathology,  
38 particularly in larger fish. Results demonstrate that there are a range of potential threats to the  
39 sustainability of tilapia aquaculture that need to be guarded against.

40 **Keywords:** Tilapia; Africa; Tilapia Viral Diseases; fish virus; Infectious Spleen and Kidney  
41 Necrosis Virus; ISKNV;

## 42 **Introduction**

43 The farming of tilapia species (*Oreochromis* spp.) is one of the most important sectors in  
44 aquaculture worldwide with total global production estimated at more than 6 686 000 tonnes in  
45 2016 (FAO, 2018). In Africa, production is still dominated by Egypt with more than 1 000 000  
46 tonnes produced in 2017 (1). However, tilapia culture has become increasingly important in  
47 several other African countries, where it boosts the local economy and constitutes an affordable  
48 source of animal protein for human consumption.

49 In Ghana, Nile tilapia production in 2016 had reached more than 50 000 tonnes, from only 2 000  
50 tonnes per year in 2006 (FAO, 2016) with more than 90% of the production derived from high  
51 stocking density floating cage systems in Lake Volta. However, as production systems have  
52 intensified in the area, the industry has been increasingly affected by a range of disease issues  
53 (Jansen, Cudjoe, & Brun, 2018; Verner-Jeffreys et al., 2018).

54 In 2017 (Verner-Jeffreys et al., 2018) conducted the first comprehensive disease investigation in  
55 tilapia farmed in Lake Volta Ghana. *Streptococcus agalactiae* multilocus sequence type 261 was  
56 shown to be a major cause of mortality for farmed Nile tilapia and a range of other bacterial and  
57 parasitic pathogens including *Aeromonas* spp., *Streptococcus iniae*, *Flavobacterium columnare*  
58 and a *Myxobolus* sp. were also detected.

59 Jansen et al. (Jansen et al., 2018) conducted follow up studies, including a broad-ranging  
60 epidemiological investigation and suggested that mortalities caused by bacteria in Lake Volta  
61 were not a major concern for the local economy as farmers had managed to sustain losses by  
62 increasing production of fingerlings, treatment with antibiotics and use of autogenous vaccines.

63 Historically, bacterial infections were the major threat for the health of farmed tilapia (Plumb &  
64 Hanson, 2011). However, in recent years a number of viral diseases have emerged worldwide with

65 devastating effects for the industry(Machimbirike et al., 2019). Tilapia Lake Virus (TiLV) is  
66 considered the main viral challenge to tackle, as it has spread to many producing countries,  
67 causing high mortalities in all production stages. Although TiLV has been detected elsewhere in  
68 Africa (Hounmanou et al., 2018), the initial study by (Verner-Jeffreys et al., 2018), diagnostic  
69 investigations undertaken by Ridgeway Biologicals Ltd. (Ramirez *et al.* unpublished data), or the  
70 more recent survey undertaken by (Jansen et al., 2018), all failed to provide any evidence of TiLV  
71 in diseased tilapia reared in Lake Volta. Up until September 2018, with the exception of the  
72 detection of a nodavirus sequence by (Verner-Jeffreys et al., 2018), no significant association  
73 between viral agents and tilapia mortality events have been demonstrated in Ghana.

74 From September 2018 to March 2019 outbreaks of disease with very high levels of morbidity and  
75 mortality (60-90%), were experienced in both vaccinated and unvaccinated tilapia by farmers in  
76 Lake Volta. In late-September 2018, a farm located below the lower dam in the region of  
77 Asutsuare, was the first to suffer episodes of massive acute mortalities (<https://goo.gl/LmqbG2>  
78 and <https://bit.ly/2NwDEbD>). Approximately a week after the first report, a second farm located  
79 in the Akuse region (~5 km upstream of Asutsuare, but still below the lower dam) also  
80 experienced acute mortalities. By mid-October, multiple floating cage-based farms in the Dodi  
81 region (above the upper dam) reported losses of more than 10 tonnes per day  
82 <https://goo.gl/yj4oT4>. In late November, farmers that had been unaffected in the Asikuma region  
83 (downstream of Dodi but still above the upper dam) also started to suffer episodes of massive  
84 acute mortality. (**Figure 1**).

85 By the end of 2018, most tilapia farmers in Lake Volta had reported mortalities that they were not  
86 able to contain by increased production of fingerlings or treating with antibiotics (**Supplementary**  
87 **File 1**, <https://bit.ly/2KZFFuw> and <https://goo.gl/cPmpSE>). Mortality events continued into and  
88 throughout 2019. We report the results of a comprehensive disease investigation, conducted at

89 seven affected farms from two different regions of Lake Volta, to gain insights into the causes of  
90 these mortalities.

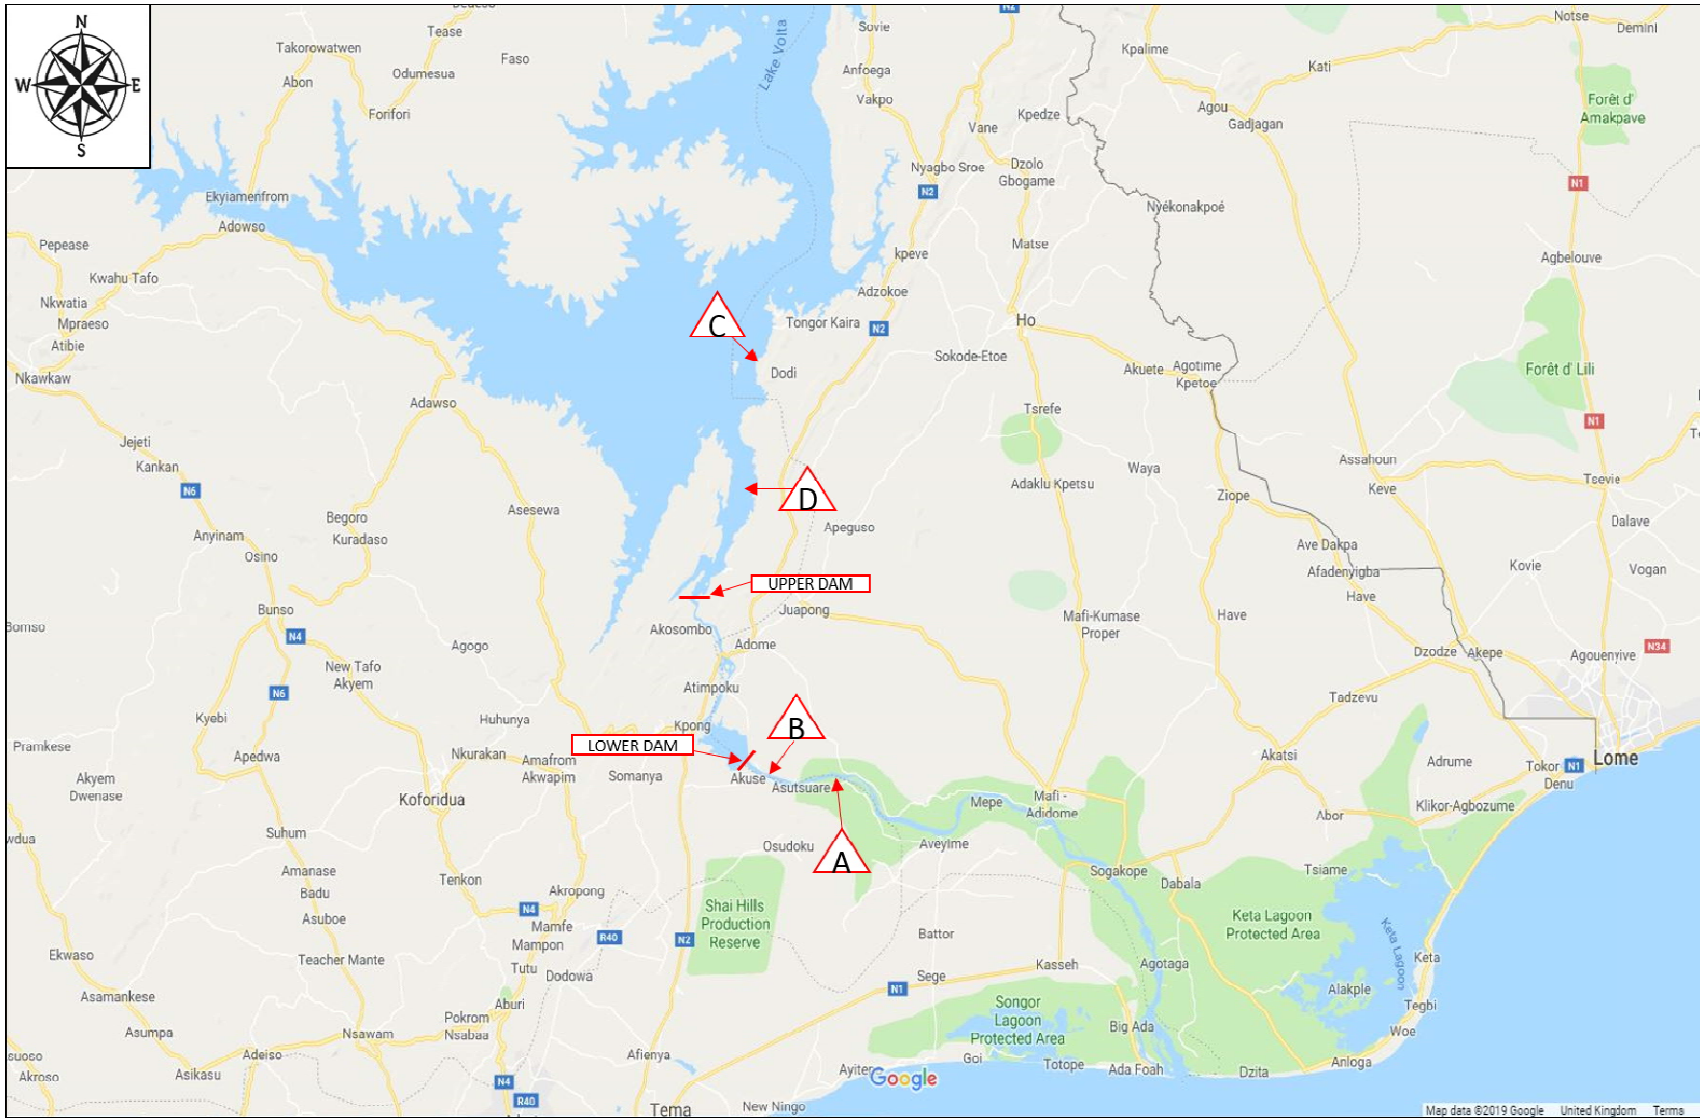

91  
92  
93

**Figure 1** Map of lower region of Lake Volta in Ghana, West Africa. Red triangles indicate the regions in chronological order (A to D) where the outbreaks of mortality occurred.

## 94 **2 Materials and Methods**

### 95 **2.1 Sampling**

96 Farm 1, a medium size (approximately 600-800 tonnes per annum production) cage culture  
97 operation on upper Lake Volta, was visited on the 18/10/18. Samples from 10 fish (average  
98 weight 200g) were taken for bacteriology. In addition five sets of samples containing liver  
99 and brain from fish from different cages were collected for molecular diagnostics as detailed  
100 in **Table 1**.

101 Farm 2, a large cage culture operation (>2000 tonnes per annum), was visited for sampling on  
102 28/11/18, 17/12/18 and 20/02/19. For the first two visits, moribund fish between 40-646g  
103 collected from cages on the main lake were sampled. In the first visit for bacteriology and  
104 virology on the second visit for virology only. For the third visit, responding to reports that  
105 they were now experiencing very heavy mortalities in their fry production units (>70%),  
106 samples of moribund fry and juveniles from both nursery cages on the main lake and from  
107 their onshore hatchery supplied with water pumped from the main lake, were analysed for  
108 virology. From this farm material was also taken for histological and molecular diagnostic  
109 investigations during the visits as detailed in **Table 1 and Supplementary File 2**. During the  
110 visits, semi-structured interviews were carried out with farm managers and/or workers.  
111 Interview questions were primarily constructed to ascertain trends in mortality levels since  
112 September 2019, any observed clinical signs in this time and whether there were any  
113 differences in impact associated with fish life stage and/or system. Additionally, relevant  
114 information on potential risk factors, mitigation measures and biosecurity practices, as well as  
115 any further farmer concerns, were discussed.

116 A further 5 farms in the Akosombo, Atimpoku and Dasasi regions were visited and sampled  
117 for virology, bacteriology, histology and molecular diagnostic investigation from 9-

118 10/07/2019. These included fry, on-growing and broodstock fish from farms of varying  
119 capacity and with either no reported disease, fish that had survived recent mortality events on  
120 farms or fish with ongoing clinical signs or mortalities.

121

122 All moribund fish from the visited farms were humanely euthanised with a lethal overdose of  
123 tricaine methanesulfonate 1,000 mg/g (Pharmaq, Hampshire, UK) followed by brain  
124 destruction prior to the necropsy.

## 125 **2.2 Bacteriology**

126 Samples for bacteriology were collected from the brain, liver, kidney and spleen with sterile  
127 cotton swabs and inoculated onto tryptone soya agar (TSA), Columbia blood agar (CBA),  
128 Tryptone yeast extract salts agar (TYES) (Southern Group Laboratory, Corby, UK) and  
129 cystine heart agar with 2% bovine haemoglobin (CHAH) (Becton Dickinson, Oxford, UK).

130 All inoculated agar plates were incubated at 28 °C for 24-72 hours. Colonies assessed as  
131 significant based on occurrence and dominance were subcultured to purity on similar media.  
132 Pure relevant isolates were initially identified by morphology and Gram staining. The partial  
133 16S rRNA genes of the Gram negative isolates identified were PCR amplified and sequenced  
134 using the method described by (Klindworth et al., 2013). Gram positive cocci forming chains  
135 were screened using a *Streptococcus agalactiae* specific capsular typing multiplex PCR  
136 developed by (Shoemaker, Xu, Garcia, & Lafrentz, 2017). The Gram negative isolates strains  
137 confirmed as *Aeromonas* spp. based on partial 16S rRNA gene sequence analysis were  
138 further characterised based on partial *gyrB* sequencing analysis for identification at the  
139 species level as described by (Yáñez, Catalán, Apráiz, Figueras, & Martínez-Murcia, 2013).

## 140 **2.3 Histopathology and Electron Microscopy**



141 Tissues were fixed in neutral buffered formalin (NBF) for a minimum of 24 hr before being  
142 placed in glycerol diluted 50:50 with phosphate buffered saline (PBS) for transportation to  
143 Cefas. On receipt, tissues were rinsed in 70% alcohol and placed again in NBF for a final  
144 period of fixation prior to processing using standard protocols in a vacuum infiltration  
145 processor. Tissue sections were cut at a thickness of 3-4  $\mu\text{m}$  on a Finnese® microtome,  
146 mounted on glass slides and stained with haematoxylin and eosin using an automated staining  
147 protocol. Stained sections were examined for general histopathology by light microscopy  
148 (Nikon Eclipse E800). Digital images and measurements were obtained using the Lucia™  
149 Screen Measurement software system (Nikon, UK).

150 For electron microscopy, small samples of tissues fixed in NBF as above were rinsed three  
151 changes of 0.1 M sodium cacodylate buffer, followed by post fixation in 2.5% glutaraldehyde  
152 in the same buffer for 1 hour prior to a second post fixation for 1 hour in 1 % osmium  
153 tetroxide in 0.1 M sodium cacodylate buffer. Subsequently, fixed tissues were dehydrated in  
154 an ascending acetone series acetone series and embedded in epoxy resin 812 (Agar Scientific  
155 pre-Mix Kit 812, Agar scientific, UK) and polymerised at 60 °C overnight. Semi-thin (1  $\mu\text{m}$ )  
156 survey sections were stained with 1 % Toluidine Blue and examined by light microscope to  
157 identify areas of interest. Ultrathin sections (70-90 nm) of the targeted areas were placed on  
158 uncoated copper grids and stained with uranyl acetate and Reynold's lead citrate (Reynolds  
159 1963). Grids were examined using a JEOL JEM 1400 transmission electron microscope and  
160 digital images captured using a GATAN Erlangshen ES500W camera and Gatan Digital  
161 Micrograph™ software.

## 162 **2.4 Molecular diagnosis (viral and bacterial detection)**

163 The samples collected for molecular diagnosis were washed twice in 750 $\mu\text{l}$  of sterile 1x PBS  
164 to remove the RNA-*later*® and homogenised. Total nucleic acids were extracted using

165 nanomagnetic beads i.e. Genesig Easy DNA/RNA Extraction Kit (Primerdesign,  
166 Southampton, UK) and stored until further use.

167 *Multiplex PCR for detection of Streptococcus spp.*

168 Nucleic acids extracted were used as a template on a multiplex PCR (unpublished data) to  
169 confirm the presence of *Streptococcus* spp. that had been previously reported as fish  
170 pathogens including *Streptococcus agalactiae* (Delannoy et al., 2013), *Streptococcus uberis*  
171 (Luo et al., 2017) and *Streptococcus dysgalactiae* (Abdelsalam, Asheg, & Eissa, 2013).

172 *qPCR for detection of TiLV and Nodavirus*

173 Nucleic acids were used for the detection of tilapia lake virus and nodavirus by quantitative  
174 PCR using the commercial kits: Path-TiLV-EASY and Path-Betanodavirus-EASY  
175 (Primerdesign, Southampton, UK) in the platform Genesig q16® (Primerdesign,  
176 Southampton, UK) as per the protocols suggested by the manufacturer.

177 *Conventional PCR for detection of megalocytiviruses*

178 The generic PCR protocol for notifiable aquatic megalocytiviruses (Red Seabream Iridoviral  
179 disease / Infection spleen and kidney necrosis virus (J Kurita, Nakajima, Hirono, & Aoki,  
180 1998; World Organisation for Animal Health OIE, 2018)) was initially used, to screen the  
181 samples of fish collected from visit 2 at Farm 2. For this, genomic DNA was extracted as  
182 follows: the RNA-later® was removed and the tissue samples weighed. Depending on the  
183 weight of the tissue available the samples were diluted in RTL buffer (Qiagen) to provide  
184 either a 1:10 w/v or a 1:5 w/v and homogenised per fish i.e. all the organs of each fish into an  
185 individual pool using Matrix A and the FastPrep apparatus (MP Biomedicals). Following  
186 homogenisation, the samples were diluted further with RTL buffer to give a 1:60 w/v

187 homogenate and total nucleic acid was extracted from 300 µl of the clarified sample using the  
188 RNA tissue mini kit without DNase (Qiagen) and eluted in a 60 µl volume.

189 RT was performed at 37°C for 1 h in a 20 µl volume consisting of 1× M-MLV RT reaction  
190 buffer (50 mM) Tris pH 8.3, 75 mM KCl, 10 mM DTT, 3 mM MgCl<sub>2</sub>) containing 1 mM  
191 dNTP, 100 pmol random primers, 20 U M-MLV reverse transcriptase (Promega,  
192 Southampton UK) and 4µl of the nucleic acid extracted above.

193 PCR was performed in duplicate in a 50 µl reaction volume with 2.5 µl of cDNA of total  
194 nucleic acid, 25 mM dNTPs, 1 x GoTaq® buffer (2.5 mM MgCl<sub>2</sub> solution), 5 pmol of each  
195 primer (C1105 5'-GGTTCATCGACATCTCCGCG-3' and C1106 5'-  
196 AGGTCGCTGCGCATGCCAATC-3') and 1.25 units of GoTaq® DNA polymerase  
197 (Promega). The cycling conditions were as follows: 40 temperature cycles (1 min at 95°C, 1  
198 min at 55°C and 1 min at 72°C) after an initial denaturing step (5 min at 95°C) followed by a  
199 final extension step of 10 min at 72°C.

200 Amplified products were electrophoresed in a 2% (w/v) agarose/TAE (40 mM Tris-acetate,  
201 pH 7.2, 1 mM EDTA) gel containing 1.0 µg ml<sup>-1</sup> ethidium bromide at 120 v for 30 mins and  
202 viewed under UV light.

203 PCR products were excised from the gel and the DNA was extracted and purified by ethanol  
204 precipitation. Both strands of the PCR product were sequenced using the ABI PRISM Big  
205 Dye Terminator v3.1 cycle sequencing kit and the same primers used for the amplification.  
206 The forward and reverse sequences were aligned and a consensus sequence generated using  
207 the CLC software (Qiagen). Generated consensus sequences were compared with sequences  
208 from GenBank using BLASTN (Altschul et al., 1997) and aligned using the MUSCLE  
209 application of the MEGA software version 6 (Tamura, Stecher, Peterson, Filipiski, & Kumar,  
210 2013).

211 In addition, the OIE recommended PCR protocol for notifiable aquatic megalocytiviruses  
212 (World Organisation for Animal Health OIE, 2018) developed by (J Kurita et al., 1998) was  
213 used was used to screen total nucleic acids extracted from the rest of the samples fixed for  
214 viral molecular analyses.

215 In analyses from farms where clinical disease was not observed, a second round PCR using  
216 the nested primers C1073 5'-AATGCCGTGACCTACTTTGC-3' and C1074 5'-  
217 GATCTTAACACGCAGCCACA -3' (15) was employed.

#### 218 *qPCR for detection and quantification of megalocytiviruses*

219 The amount of virus present in the samples was also investigated by qPCR. For this the  
220 homogenised tissues were subjected to total nucleic acids extraction (~20mg of each organ)  
221 using the Genesig Easy DNA/RNA Extraction Kit (Primerdesign) as described earlier. The  
222 extracted nucleic acids were tested using the commercial kit Path-ISKNV-EASY  
223 (Primerdesign, Southampton, UK) in the platform Genesig q16® (Primerdesign) as per the  
224 manufacturer instructions. This detects both red sea bream iridovirus and ISKNV variants. In  
225 all cases fish were individually analysed either by pooling liver, spleen and brain or screening  
226 individual tissues.

#### 227 *Retrospective analyses of archived samples by qPCR*

228 A total of 16 samples of archived tissue homogenates from 5 different farms (that included  
229 Farms 1 and 2) were retrospectively screened for ISKNV by qPCR with the commercial kit  
230 Path-ISKNV-EASY as described before. From these 7 had been collected during 2017 and  
231 the rest in March 2018 (**Supplementary File 5**). All the samples had been previously  
232 confirmed as negative for TiLV and Nodavirus using the commercial kits Path-TiLV-EASY  
233 and Path-Betanodavirus-EASY.

234 *Virus isolation*

235 Frozen spleen and kidney tissue or whole fry of fish showing clinical signs taken from 2 farm  
236 sites on Lake Volta on 10 July 2019 were homogenised with sand and pestle and mortar in  
237 1:10 w/v cell culture transport medium (L-15 plus 1% antibiotic antimycotic solution, Gibco).  
238 Homogenate was clarified by centrifugation for 10 min at 3000g, inoculated at 1:100 and  
239 1:1000 final dilutions onto GF, BF-2 and E-11 cells in 24 well cell culture plates (Gibco) and  
240 incubated at 25°C. After 7 days cells were blind passaged and incubated for a further 7 days.  
241 Cells were observed for cytopathic effect (CPE) by light microscopy with phase contrast  
242 (IX83 inverted microscope, Olympus, UK).

243

244 **3 Results**

245 3.1 Farm visits

246 On the first visit to Farm 2 on the 27/11/18, farm staff reported very high and ongoing  
247 mortalities (Figure 2) in fish bigger than 20g, including broodstock, but no significant losses  
248 in fingerlings. Losses reportedly peaked at about 670 crates (equating to approximately 40  
249 tonnes per day) shortly after this visit on the 2/12/2018 (**Figure 2**).

250 Losses were so severe that accurate estimation was not possible, with more than 50 additional  
251 labourers recruited locally just to remove dead and moribund fish during the peak period. By  
252 the second visit to Farm 2, losses of ongrowing fish had reportedly declined back to the  
253 background 10-20 crates per day more typically observed i.e. less than 1-2 tonnes per day  
254 (**Figure 2**).

255

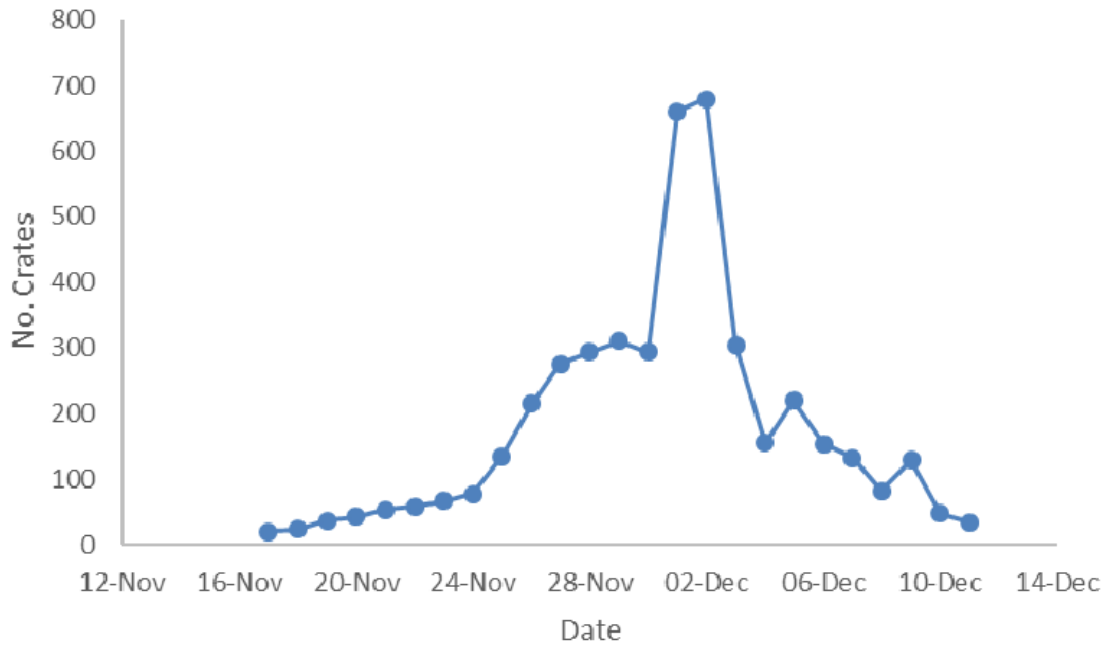

256  
257  
258  
259  
260  
261  
262

**Figure 2. Number of crates of dead/ moribund fish removed from Farm 2 during period of maximum losses.** Daily mortalities were estimated based on numbers of crates of rejected ongrowing tilapia collected each day by farm staff. Each crate typically contained approximately 60kg tilapia collected from the cages and rejected because they were either dead, moribund or displayed other adverse signs that prevented their sale.

263 During the first two visits to the farms, but particularly to Farm 2, diseased fish were  
264 observed swimming away from the school with erratic swimming i.e. on one side, in circles,  
265 lethargic, with no equilibrium, upside down etc. (**Supplementary File 3**).

266 Externally, the fish displayed a range of clinical signs, including skin nodules, frayed fins,  
267 loss of eyes, opaque eyes, loss of scales, exophthalmia, anorexia, decolouration or darkened  
268 skin, excess of mucous, skin haemorrhages and distended abdomen (**Figure 3**). At necropsy,  
269 fish from both the first visits to Farm 1 and 2 presented with marked ascites, enlarged and  
270 haemorrhagic organs including the spleen, heart, brain, gills, but most notably liver and  
271 kidney. The gastrointestinal track was empty of solids but contained transparent fluid similar  
272 to that also seen in the peritoneal cavity.

273 In contrast to the earlier visits, when Farm 2 was visited on 20/02/19, there were very high  
274 and ongoing mortalities in the fry production systems (>70%). This was both in their onshore  
275 hatchery (supplied with water pumped from the main lake) where eggs were hatched and held  
276 until the fry were approximately 20g, and in the nursery cages on the main lake to which fry  
277 had been transferred. As with the larger fish sampled, affected fry showed erratic swimming  
278 behaviour, skin haemorrhages and severe ascites as the main clinical signs (**Figure 3**).

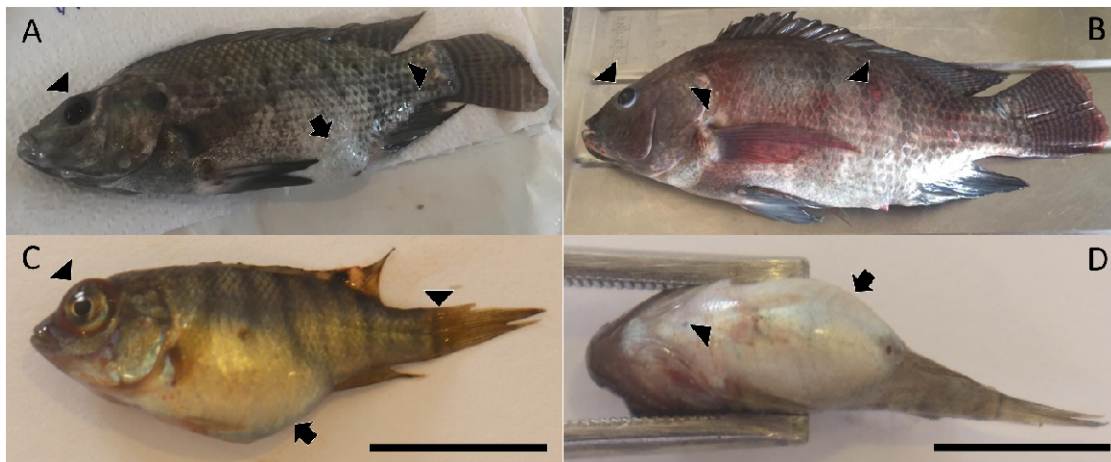

279  
280 **Figure 3 External lesions and clinical signs in diseased Nile tilapia in Lake Volta. A**  
281 **Ongrowing fish with emaciation slight ascites (arrow), endophthalmia (left arrow head) and**  
282 **skin purulent abscess (right arrow head). B Broodstock with microphthalmia left arrow head,**  
283 **skin haemorrhages (middle arrow head) and skin ulcers (right arrow head). C juvenile with**  
284 **exophthalmia (left arrow head), ascites (arrow) and loss of scales, excess of mucus and**  
285 **haemorrhages (right arrow head). Bar = 1cm. D Ventral view of juvenile fish presenting**  
286 **severe ascites black arrow and skin haemorrhages (arrow head). Bar= 1cm.**  
287  
288

### 289 3.2 *Megalocytivirus* and bacterial infections in Farm 2 during period of high mortalities

290 Four out of the ten fish examined histologically showed mild tissue necrosis in the spleen and  
291 renal haematopoietic tissue with the presence of large numbers of cells showing relative  
292 eosinophilia cytoplasmic and nuclear pleomorphism with margination of chromatin in some  
293 affected nuclei suggestive of a viral infection diffused throughout the tissue (**Figure 4**).

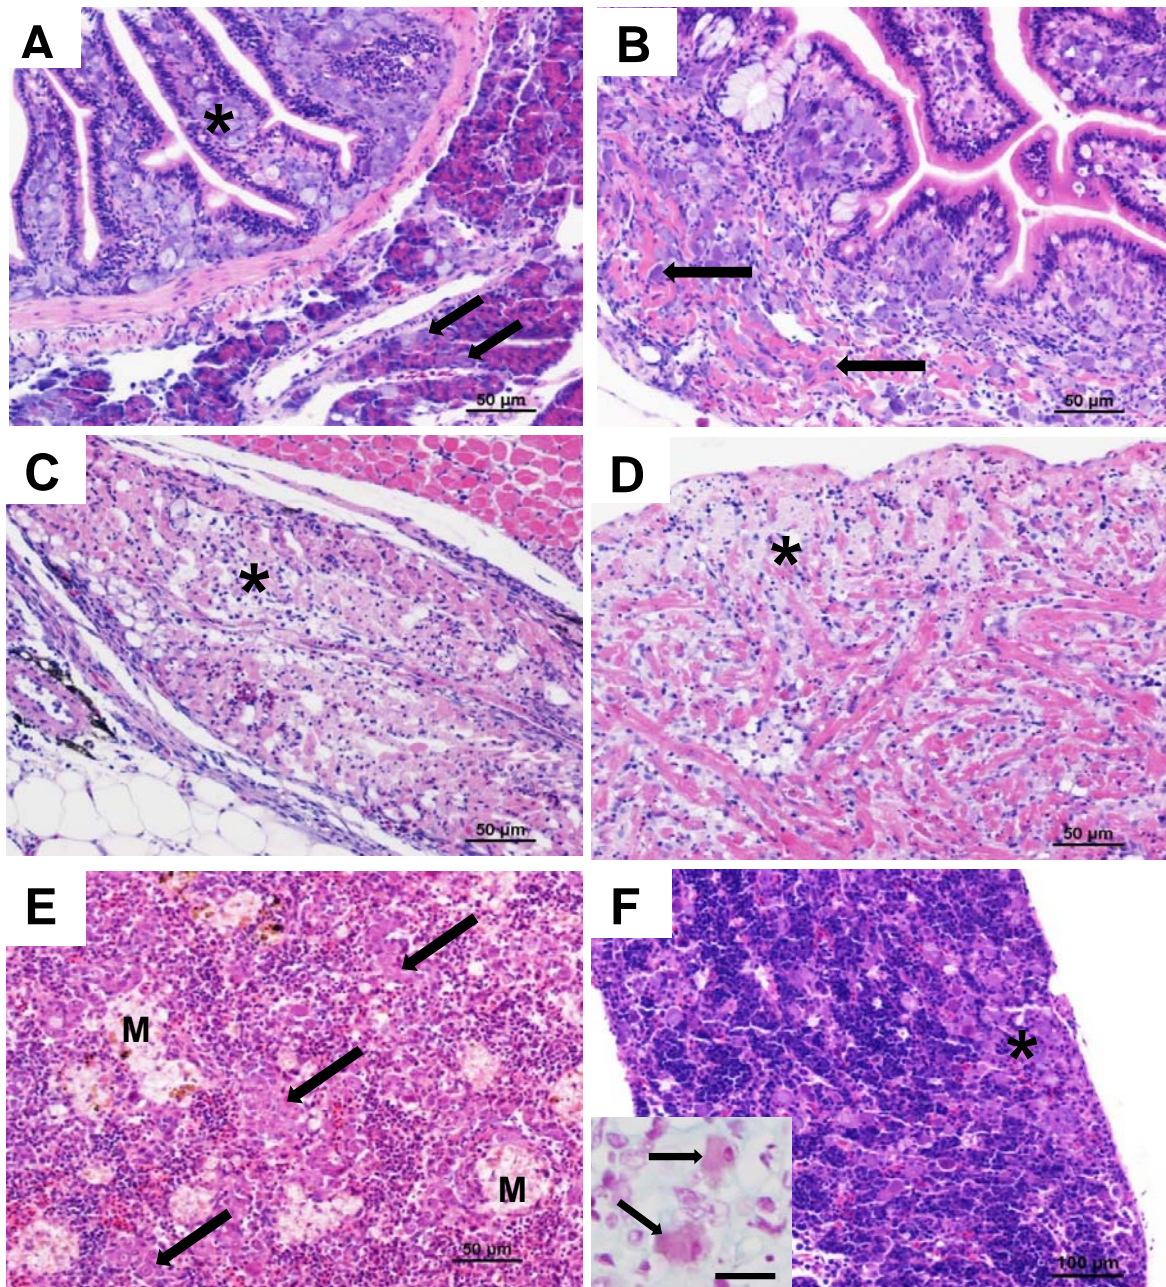

294 **Figure 4 Histopathological cross sections of tissues from diseased Nile tilapia in Lake Volta.** All  
295 sections stained with H&E unless otherwise stated. **A.** Section through the intestine of an infected fry  
296 showing the presence of large numbers of megalocytes in the lamina propria (\*) but not affecting the  
297 mucosa or underlying muscularis. Note the presence of isolated megalocytes in the pancreatic acinar  
298 tissue (arrows). Bar = 50µm. **B.** Same fish as in A, showing infiltration and disruption of the  
299 muscularis associated with the presence of megalocytes (arrows). Bar=50 µm. **C.** Pseudobranch  
300 showing extensive necrosis (\*). Bar=50µm. **D.** Heart showing necrosis of the ventricular muscle (\*),  
301 particularly in the peripheral regions associated with inflammation. Bar=50µm. **E.** Spleen from a fish  
302 from Farm 2 during a mortality episode. Affected cells show pronounced eosinophilia and are  
303 distributed throughout the section (\*). Numerous vacuolated macrophage aggregates are also present  
304 (M). Bar = 50µm. **F.** Pronephros showing extensive distribution of megalocytes without associated  
305 tissue necrosis (\*). Bar=100µm. Inset shows pale staining of DNA in the cytoplasm of affected cells  
306 (arrows). Feulgen stain. Bar=25µm.



307 The ultrastructure of affected cells revealed the presence of conspicuous viral particles. Some  
308 cells showed the presence of numerous diffusely spread virions within the hypertrophied  
309 nucleus of affected cells, which also showed degradation of the nuclear membrane (**Figure**  
310 **5**). Virions were approximately 160 nm in diameter (**Figure 5D**). Virion morphology  
311 showing icosahedral symmetry with an external double membrane and internal core was  
312 consistent with that of viruses from the genus *Megalocytivirus*. In other cases, the nucleus of  
313 affected cells appeared condensed and densely stained in histological and resin sections.  
314 TEM showed that in these cases the nucleus was tightly packed with virions in various stages  
315 of maturation and with some evidence of formation of ‘arrays’ (**Figure 5**). In two of these  
316 cases, a concomitant Gram +ve bacterial infection was also present in the gill and liver.  
317 Incidental findings of gill parasites, myxozoan cysts and monogeneans, both present in low  
318 numbers as well as low grade epitheliocystis were observed. The brain of a single fish  
319 harboured small cysts containing necrotic debris. Gram and Ziehl-Neelsen staining did not  
320 demonstrate the presence of bacteria. Other tissues appeared normal. For the set of samples  
321 collected at the height of the mortalities from Farm 2 on 28/11/18, *Aeromonas jandaei*,  
322 *Aeromonas veronii* (from skin), *Streptococcus agalactiae* capsular type Ib biotype 2 (non  
323 haemolytic) and *Edwardsiella tarda* (from liver and kidney) were recovered.

### 324 *3.3 PCR and sequence confirmation of Megalocytivirus infection*

325 Within the 7 individuals collected from Farm 2 on the second visit that were analysed with  
326 the protocol proposed by (Rimmer, A. E., Becker, Tweedie, & Whittington, 2012), a single  
327 fish (fish 1) was clearly positive by PCR for RSIV/ISKN and a second very weak product of  
328 the correct size was also seen in tissues from Fish 6 (**Supplementary File 4**) The consensus  
329 sequence generated from the PCR product from Fish 1 was confirmed as ISKNV sharing  
330 100% nucleotide identity with ISKNV accession no [AF371960.1](https://www.ncbi.nlm.nih.gov/nuccore/AF371960.1). In the phylogenetic

331 analysis the sequence was assigned to the same lineage as the bulk of the ISKNV sequences  
332 (**Figure 6**).

333 The samples collected from Farm 1 and Farm 2 at the height of the mortalities were found to  
334 be strongly positive when they were retrospectively tested using the (J Kurita et al., 1998;  
335 World Organisation for Animal Health OIE, 2018) current OIE recommended PCR method.

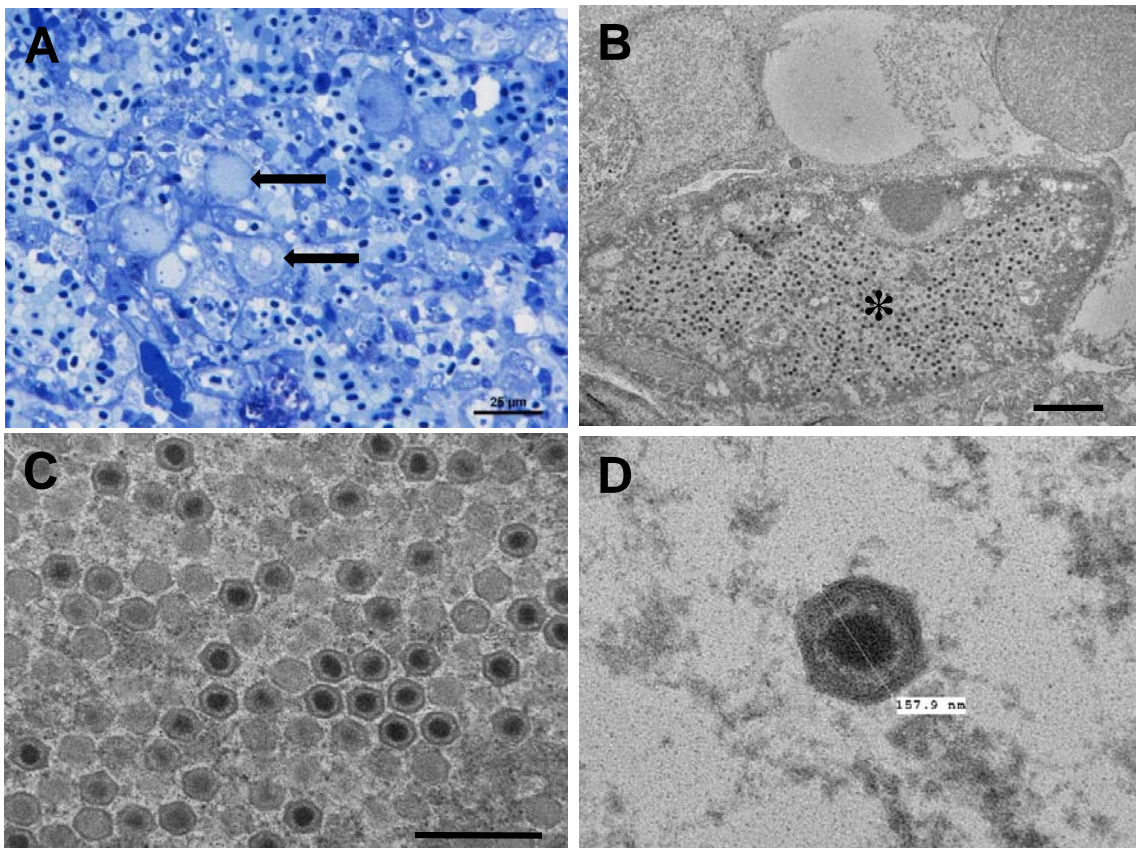

336 **Figure 5 Micrographs of the kidney of diseased Nile tilapia in Lake Volta. A** Semithin  
337 section of affected renal tissue showing characteristic cellular hypertrophy (black arrows).  
338 Toluidine Blue stain. Scale bar = 25 $\mu$ m. **B.** Electron micrograph of an individual infected cell  
339 with numerous viral particles (\*). Adjacent cells appear uninfected. Scale bar = 2 $\mu$ m. **C.**  
340 Numerous lightly stained developing virions with mature virions. The outer membranes and  
341 central electron lucent core are clearly visible. Scale bar = 500nm. **D.** Mature icosahedral  
342 virion showing detail of the outer capsid and inner membrane with central electron lucent  
343 core.  
344  
345  
346  
347  
348

349

350 *3.4 qPCR results for megalocytivirus from on-growing tilapia samples*

351 The qPCR results confirmed that all the fish sampled from Farm 1 in the Akuse region were  
352 positive for megalocytivirus. Also, as expected, the samples collected from the first Farm 2  
353 visit during the peak of mortality (28/11/18), were also positive and presented the highest  
354 viral titres in grow out fish with some containing over  $3 \times 10^6$  copies per sample reaction. In  
355 contrast, the samples collected from grow out fish during the second visit to Farm 2 had  
356 much lower viral copy numbers.

357 All the archived samples collected in 2017 and March 2018 were negative for ISKNV, when  
358 tested by qPCR (**Supplementary File 5**).

359 *3.5 Fry samples had characteristic megalocytivirus pathology and high copy numbers of*  
360 *virus*

361 All the fry samples collected from Farm 2 on 20/02/19, when there were reportedly very high  
362 (>90%) losses in that part of their system, were positive for ISKNV by qPCR and these  
363 presented the highest titres in the study with some containing up to  $1.5 \times 10^7$  copies per  
364 sample reaction (**Table 1**). All fry showed moderate to marked histological and pathological  
365 features of infection with *megalocytivirus*. Splenic tissues were necrotic and associated with  
366 the presence of megalocytes characterised by light sometimes granular cytoplasmic  
367 basophilia and hypertrophied nuclei. Kidney also showed the presence of megalocytes but  
368 usually with only mild cellular necrosis. The lamina propria in the intestine of a single fish  
369 was packed with megalocytes (**Figure 4**), although necrosis appeared to be absent and the  
370 epithelial layer remained intact. Gills showed only minimal focal necrosis, usually affecting  
371 the underlying connective tissues. In some fish the choroidal rete was affected with mild  
372 necrosis and variable numbers of megalocytes and most fish showed mild myositis with few

373 megalocytes in the skeletal muscle. However, a single fish showed extensive inflammation  
374 and myofibrillar necrosis (**Figure 4**). Connective tissues of the head and in particular around  
375 the pharyngeal teeth were often infiltrated with megalocytes. Brain and spinal cord appeared  
376 normal. Liver samples were not examined as they were used for virus quantification.

377

### 378 3.6 Other pathological observations

379 *Megalocytivirus* -like pathology was not observed in any of the samples taken from the  
380 second visit to Farm 2, two weeks after the peak of mortalities had passed. As with the  
381 samples taken at the first visit, there was evidence of bacterial infection in some individuals,  
382 particularly fish 5, had marked bacterial infection of the spleen, liver and brain (meningitis).  
383 All the samples were positive for the presence of *Streptococcus agalactiae* and negative for  
384 *Streptococcus uberis* and *Streptococcus dysgalactiae* by PCR (**Supplementary File 6**).

385 A range of different potential bacterial species, including *Aeromonas jandaei* and  
386 *Plesiomonas shigelloides* were recovered from fish from Farm 1 (**Table 1**), but not as pure  
387 growths or high quantities, suggesting they had a limited role in observed disease in these  
388 animals.

389 All the samples from Farm 1 and Farm 2 tested for TiLV and from Farm 2 for nodavirus by  
390 qPCR were all negative (**Table 1 and Supplementary File 4**).

391

392 The results for all the individual fish tested are shown in Supplementary File 2.

393

394 3.7 Follow up testing in July 2019

395 A further 5 farms sampled in July 2019 were tested using nested conventional PCR (15).  
396 Fish on farms Farms 6 (fry) and 7 (lake ongrowers) were experiencing ongoing mortality and  
397 showing typical clinical signs described above at time of sampling. All samples were  
398 strongly positive in a single round assay and virus was isolated in cell culture from both  
399 farms. For samples from farms 4 (fry) and 5 (lake ongrowers) which both were  
400 recovering from recent mortality events, but had no remaining observable clinical disease,  
401 between 40-100% of samples tested positive but these were in second round only of nested  
402 assay and in some cases only in one of duplicate reactions indicating low levels of virus.  
403 From farm 3 (all age groups) for which no mortality events had been reported between 30%  
404 to 100% of samples were positive but all in the second round only. On sequencing  
405 representatives from all positive farms showed identical sequence (data not shown).

| Sampling date & Farm  | No. of Fish and size                                                                              | Farm observations and ‡clinical signs                                                                                                  | Bacteriology                                                                                                                                                          | Histopathology                                                                                                                | Virology Results <sup>‡</sup><br>[ ] – qPCR <sub>RSIV/ISKNV</sub> copy number/sample reaction range                                                                                                                                            |
|-----------------------|---------------------------------------------------------------------------------------------------|----------------------------------------------------------------------------------------------------------------------------------------|-----------------------------------------------------------------------------------------------------------------------------------------------------------------------|-------------------------------------------------------------------------------------------------------------------------------|------------------------------------------------------------------------------------------------------------------------------------------------------------------------------------------------------------------------------------------------|
| 18/10/2018<br>†Farm 1 | n=5; 100-300g                                                                                     | Wide scale ongoing mortalities in on growing fish in cages.                                                                            | <i>Aeromonas veronii</i> ;<br><i>Aeromonas jandaei</i> ;<br><i>Plesiomonas shigelloides</i> ;<br><i>Chryseobacterium sp</i> ;<br><i>Acinetobacter johnsonii</i> ;     | Not done                                                                                                                      | *qPCR <sub>TILV</sub> 5/5 -ve<br>*cPCR <sub>a</sub> ISKNV 4/5 +ve<br>*qPCR <sub>RSIV/ISKNV</sub> 5/5 +ve<br>[7.5 x 10 <sup>1</sup> – 4.60 x 10 <sup>5</sup> ]                                                                                  |
| 28/11/2018<br>†Farm 2 | n=14; 74-401g                                                                                     | Wide scale ongoing mortalities in on growing fish in cages ( <b>Figure 2</b> ). On shore fry production unit: no unusual mortalities.  | <i>Aeromonas veronii</i> ;<br><i>Aeromonas jandaei</i> ;<br><i>Streptococcus agalactiae</i> capsular type Ib biotype 2 (non-haemolytic);<br><i>Edwardsiella tarda</i> | Evidence of Gram negative and Gram positive bacterial and viral# infection (including in same fish)                           | qPCR <sub>TILV</sub> 14/14 -ve<br>qPCR <sub>NODA</sub> 14/14 -ve<br>*cPCR <sub>a</sub> ISKNV 12/14 +ve<br>*qPCR <sub>RSIV/ISKNV</sub> 14/14 +ve<br>[2.48 x 10 <sup>1</sup> - 3.3 x 10 <sup>6</sup> ]                                           |
| 17/12/2018<br>†Farm 2 | n=7; 40-646g                                                                                      | Much lower mortalities in on growing fish in cages than previous sampling visit. On shore fry production unit: no unusual mortalities. | Not done                                                                                                                                                              | Evidence of bacterial infection but not of viral infection                                                                    | qPCR <sub>TILV</sub> 7/7 -ve<br>qPCR <sub>NODA</sub> 7/7 -ve<br><b>cPCR<sub>b</sub> RSIV/ISKNV 1/7 +ve</b><br><b>megalocytivirus, sequence = ISKNV</b><br>*qPCR <sub>RSIV/ISKNV</sub> 6/7 +ve<br>[1 x 10 <sup>0</sup> - 24 x 10 <sup>0</sup> ] |
| 20/02/2019<br>†Farm 2 | n=14; 6-9 cms                                                                                     | Limited mortalities in on growing fish in cages. Very severe mortalities in on shore fry production unit.                              | Not done                                                                                                                                                              | Very severe virus-associated pathology (in tissue samples from all fish).                                                     | qPCR <sub>TILV</sub> not done<br>qPCR <sub>NODA</sub> not done<br>cPCR <sub>a</sub> ISKNV 7/7 +ve<br>qPCR <sub>RSIV/ISKNV</sub> 13/13 +ve<br>[5.1 x 10 <sup>5</sup> – 1.51 x 10 <sup>7</sup> ]                                                 |
| 09/07/2019<br>Farm 3  | Grp 1, n=3; 60-80g<br>Grp 2, n=3; 20-40g<br>Grp 3, n=5; 1-2g fry<br>Grp 4, n=5 pools of ≤0.2g fry | No mortality events reported at site. Grp 1 on-growing in lake, Grps 2-4 in ponds.                                                     | Grps 1 & 2 - No significant colonies<br><br>Grps 3-5 Not done                                                                                                         | Evidence of metacercaria, bacterial gill epitheliocystis and myxosporidiosis in Grps 1 & 2. - No evidence of viral infection. | cPCR <sub>b</sub> RSIV/ISKNV<br>Grp 1 - 2/3 +ve (nested only)<br>Grp 2 - 3/3 +ve (nested only)<br>Grp 3 - 5/10 +ve (nested only)<br>Grp 4 - 3/10 +ve (nested only)                                                                             |

|                      |                                 |                                                                                                                           |                         |                                                                     |                                                                                   |
|----------------------|---------------------------------|---------------------------------------------------------------------------------------------------------------------------|-------------------------|---------------------------------------------------------------------|-----------------------------------------------------------------------------------|
| 09/07/2019<br>Farm 4 | n=5 pools of<br>≤0.2g fry       | Reported recent mortality event now recovering. No clinical signs                                                         | Not done                | Myxosporidian cysts in cranial sub-epithelial and connective tissue | cPCRb <sub>RSIV/ISKNV</sub> 2/5 +ve (nested only and in one of duplicates only)   |
| 10/07/2019<br>Farm 5 | n=5 x3 fish organ pools; ~40g   | Ongrowing fish on lake, recent mortality event in adjacent cage cleared previous month, no clinical signs in sampled fish | No significant colonies | not done                                                            | cPCRb <sub>RSIV/ISKNV</sub> 5/5 +ve (nested only, one of which weak in 1st round) |
| 10/07/2019<br>Farm 6 | n=10 x3 fish pools; 0.2-0.75g   | Ongoing losses of approx. 30% in fry pools. Fry observed with distended abdomen and disturbed swimming.                   | Not done                | Evidence of viral infection, occasionally severe                    | cPCRb <sub>RSIV/ISKNV</sub> 10/10 +ve<br>Virus isolation – BF cells               |
| 10/07/2019<br>Farm 7 | n=5 x2 fish organ pools; 20-40g | Internal haemorrhaging, ascites, pale kidney, anaemia, reduced spleen and enlarged liver                                  | No significant colonies | Evidence of viral infection                                         | cPCRb <sub>RSIV/ISKNV</sub> 5/5 +ve<br>Virus isolation – BF cells                 |

**Table 1 Summary of sampling and results**

† See Materials and Methods for farm descriptions

‡ All moribund fish, including fry, presented similar signs: erratic swimming, lethargy, ascites, swollen, dark spleen, haemorrhagic livers and other organs.

# Haematopoietic cell nuclear and cytoplasmic pleomorphism with marginalisation of chromatin and fine granulation.

¥ qPCR<sub>TILV</sub>, qPCR<sub>NODA</sub>, qPCR<sub>RSIV/ISKNV</sub>: results of qPCR testing for tilapia lake virus, nodavirus and ISKNV respectively. cPCRa & cPCRb : conventional PCR using

OIE recommended protocols by Kurita et al., 1998 (a) (J Kurita et al., 1998) and Rimmer et al., 2012 (b) (Rimmer, A. E. et al., 2012) protocols, results in bold represent

index finding, \*represents retrospective testing post index finding.

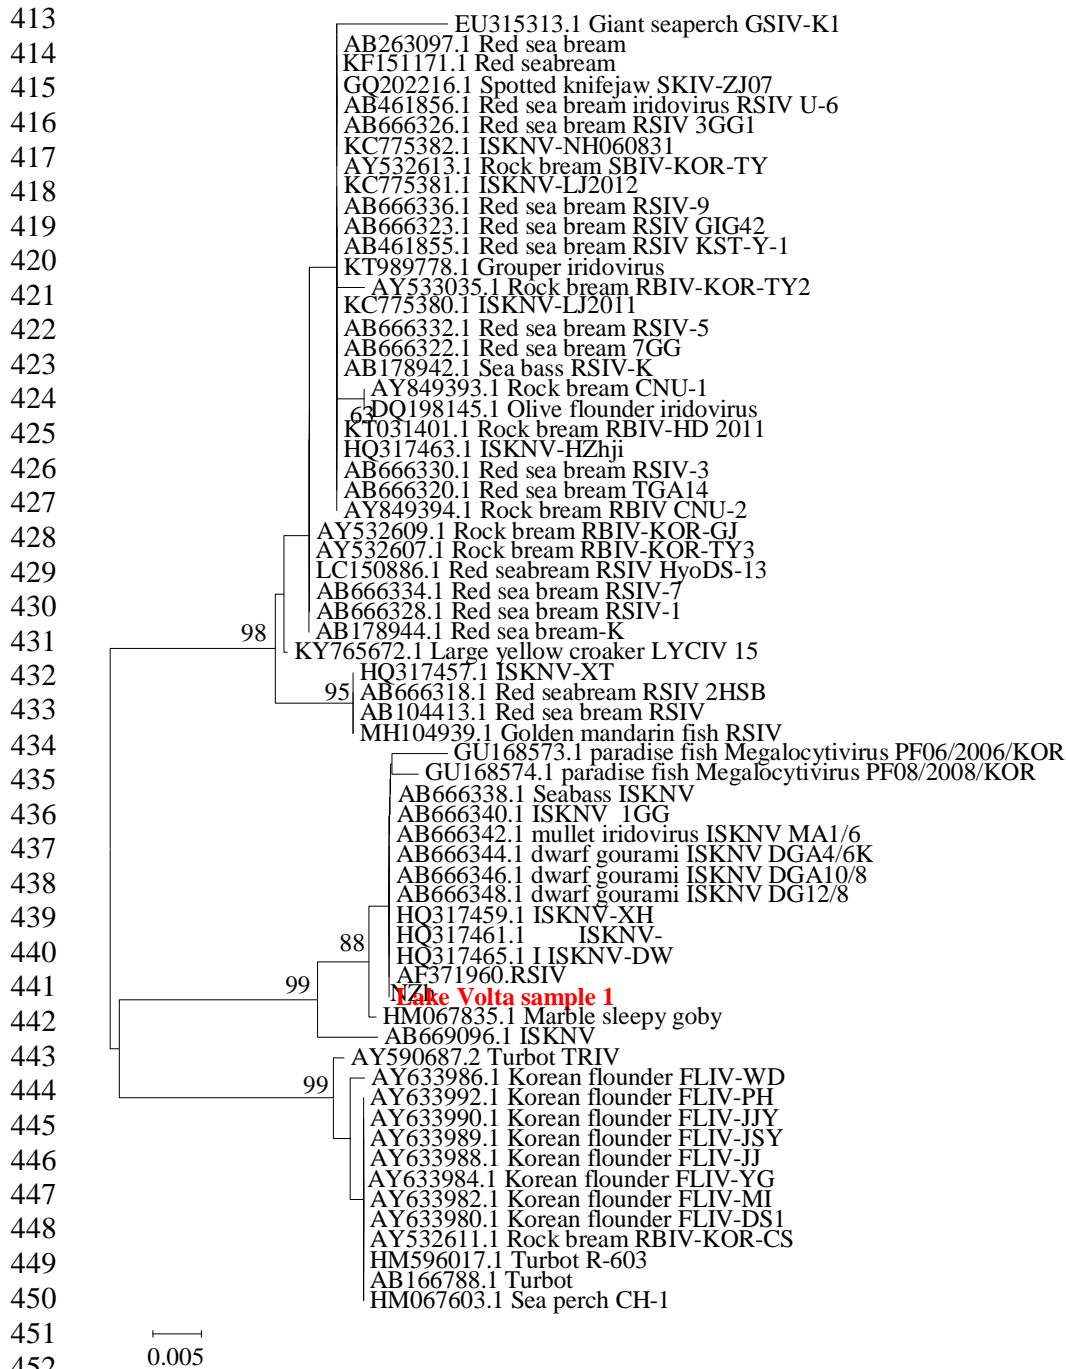

460 **Figure 6 N-J tree showing the genetic relationship of partial MCP sequence from LV#1**  
 461 **to a range of RSIV, ISKNV and related Megalocytiviruses.** The GeneBank accession  
 462 numbers and the host species are included where available.



### 463 3.8 Virus isolation

464 Fish material from Farms 6 and 7 was inoculated onto BF-2, E-11 and GF cell lines.

465 Cytopathic effects (CPE) were observed in BF-2 and E-11 cells but not GFs on first

466 inoculation (Figure 7). On passage (P1) in the same cell types CPE was only observed for

467 BF-2 cells and intensity of CPE was diminished. Isolated virus from clarified harvested cell

468 culture supernatant from the P1 BF-2 cells was confirmed positive for ISKNV by PCR with

469 sequence identical to that obtained by PCR direct from tissue homogenate (data not shown).

470

471

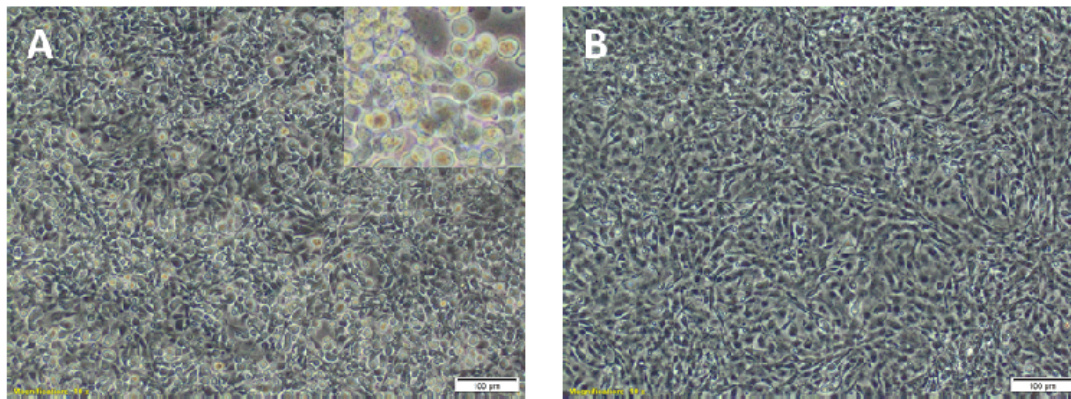

472

473 Figure 7 Virus isolation and cytopathic effects in BF-2 cells. (A) BF-2 cells at 5 days post

474 inoculation (-3 dilution) showing enlarged, rounded, phase bright cells. Inset, advanced

475 extensive CPE from -2 dilution of BF-2 at same time point. (B) Negative control BF-2 cells

476 at 5 days.

477

478

### 479 4 Discussion

480 The results suggest ISKNV had a significant role in the high mortalities experienced by the

481 two farms that were investigated. Fish sampled from the second farm at the height of the

482 disease outbreak showed severe clinical and pathological signs typically associated with

483 infection by the virus (including visualisation of distinctive megalocytes with characteristic  
484 virions). Both, these fish and those sampled earlier from Farm 2, had extremely high copy  
485 numbers of RSIV/ISKNV *Megalocytivirus*-like virions and ISKNV was confirmed by gene  
486 sequencing. Further investigations later in 2019 of five further farms from different areas of  
487 lake Volta showed by then the disease was widely established (endemic) in farms across the  
488 lake, with both symptomatic and asymptomatic fish positive by PCR for the virus. Farmers  
489 emphasised how the disease had a devastating effect on the industry during discussions on  
490 this latter visit. They reported how the disease continued to have an impact on the broodstock  
491 and growout fish at a lower rate, however the mass mortalities were now predominantly  
492 observed in juvenile fish (1-5g in weight). Survival rates to the growout stage, at that time,  
493 were estimated to be as low as 5-20%. Juvenile mortalities were reported to be episodic in  
494 nature, occurring a few days after the sex reversal process or translocation to lake cages, and  
495 lasting up to 3 to 4 weeks. These stress triggered mortality outbreaks may be indicative of  
496 either widespread persistence of virus in the environment or a latent ISKNV stage.

497 To improve survival rates, some farmers had trialled reductions in juvenile stocking densities.  
498 Large reductions in stocking density were only associated with small increases in survival,  
499 therefore this practice was not considered a viable solution. Instead, farmers resorted to a  
500 substantial increase in the level of juvenile production and stocking rates, trading off higher  
501 overall mortality with some guarantee of a small but not inconsequential harvest. The  
502 economic impact of ISKNV has been significant. The higher production costs and reduced  
503 harvests resulted in most farms having to either temporarily or permanently halt production.  
504 As larger farms can be the primary employers of some villages, the disease also had a direct  
505 impact on the livelihoods of local community members. It was also reported that tilapia  
506 market price had more than doubled due to the production shortages and that the feed sales of  
507 Raanan Fish Feeds had reduced by 70% (<https://thefishsite.com/articles/ghanaian-fish->

508 [farmers-seek-help-from-big-business](#)), both potential indicators of the virus having an impact  
509 on a much larger scale.

510 The results would be consistent with a recent introduction of the virus onto one or more farms  
511 prior to October 2018, that then extended upstream of the dam to other farms resulting in the  
512 unusual, widespread and significant mortalities observed. Firstly, there were no observations  
513 of typical ISKNV-associated pathology in any previous disease investigations, on the affected  
514 or other farms. Secondly, the limited PCR screening in this study of archived samples of  
515 diseased tilapia recovered from before the major mortality event including both farms, were  
516 all negative. Moreover, (Verner-Jeffreys et al., 2018) also screened for the presence of  
517 RSIV/ISKNV by PCR in 2016, including samples from the affected farms, without detecting  
518 the virus, or associated pathology.

519 Iridoviruses are large icosahedral cytoplasmic double-stranded DNA viruses, which can  
520 infect a wide range of hosts, including invertebrates and poikilothermic vertebrates. The  
521 family *Iridoviridae* includes five genera: *Iridovirus*, *Chloriridovirus*, *Ranavirus*,  
522 *Lymphocystivirus* and *Megalocytivirus* (Jancovich et al., 2012). Fish pathogenic iridoviruses  
523 are representatives of *Ranavirus*, *Lymphocystivirus* and *Megalocytivirus* genera  
524 (Subramaniam, Shariff, Omar, & Hair-Bejo, 2012; Whittington, Becker, & Dennis, 2010).  
525 Infectious spleen and kidney necrosis virus (ISKNV), is a member of the genus  
526 *Megalocytivirus* (Jun Kurita & Nakajima, 2012), and causes disease in a range of freshwater  
527 and marine fish species (Subramaniam, Shariff, Omar, & Hair-Bejo, 2012; Whittington,  
528 Becker, & Dennis, 2010). ISKNV is closely related to red sea bream iridovirus and both  
529 viruses are listed by the OIE as notifiable pathogens (World Organisation for Animal Health  
530 OIE, 2018). Although tilapia is not listed as a susceptible species by the OIE at present  
531 (World Organisation for Animal Health OIE, 2018), recent reports from the USA

532 (Subramaniam et al., 2016) and Thailand (Suebsing et al., 2016) suggest that it is a  
533 susceptible species likely to suffer significant mortality. The change in the known host range  
534 of virus needs to be communicated to the international community to prevent future  
535 transboundary spread through movement of infected tilapia.

536 It was interesting to note that many of the ISKNV positive fish were actively co-infected with  
537 *Streptococcus agalactiae* and other bacterial pathogens, presenting severe bacteraemia /  
538 meningitis, as well as ISKNV-associated pathology. The high mortalities on the farms in the  
539 larger on-growing fish may well have been exacerbated by these coinfections.

540 Although the mortalities were initially confined to on-growing fish in cage culture systems,  
541 the later observations of very high ISKNV associated mortalities in fry, associated clinical  
542 signs and high viral copy numbers shows the virus likely affects all life stages. As fry are  
543 often reared in onshore facilities below the dam and then translocated to on-growing cages on  
544 the main lake, this may have been one of the routes that disease was rapidly spread after it  
545 first emerged. Anecdotally, at the time of writing, farmers on the sites visited report that  
546 mortalities in on-growing facilities have declined, while fry production continues to be badly  
547 affected. It is possible that surviving fry have been exposed to the virus and then protected  
548 against subsequent exposure. This suggests that immunisation of fry, or use of previously  
549 exposed individuals, could represent a practical disease management strategy. Vaccination as  
550 a control strategy may be used to control red sea bream iridiodovirus (Nakajima et al., 1999;  
551 Shimmoto, Kawai, Ikawa, & Oshima, 2010) and there are also encouraging reports of its  
552 potential effectiveness for protection against ISKNV in mandarin fish (Dong, Weng, He, &  
553 Dong, 2013). As some of these reports showed efficacy using formalin killed virus infected  
554 cells (Dong et al., 2013), rapid development and testing of vaccines based on the direct use

555 of the strain(s) of ISKNV circulating in Lake Volta farms (e.g. autogenous vaccines) should  
556 be possible.

557 Outbreaks of disease that cause significant morbidity and/or mortalities in an aquaculture  
558 operation is always a major concern. This is exacerbated when this appears to represent the  
559 incursion of a new agent into a system, or region (country or zone in a country) which has not  
560 previously been affected. A stark example of this is the epidemic of infectious salmon  
561 anaemia virus (ISAV) which reduced production by three quarters and resulted in severe  
562 economic and social crisis in the developing Chilean Atlantic salmon industry between 2007  
563 and 2010 (Godoy et al., 2008; Mardones, Martinez-Lopez, Valdes-Donoso, Carpenter, &  
564 Perez, 2014; Vike, Stian Nylund, & Nylund, 2009).

565 The Ghanaian authorities have for some time been concerned that the, to date, successful,  
566 expansion of its industry on Lake Volta may be affected by such disease incursions. Partly for  
567 this reason, and to safeguard the genetic integrity of Lake Volta Nile tilapia strains, they have  
568 tried to limit the culture to locally reared Nile tilapia stocks. However genetic testing by the  
569 Ghanaian Fisheries Commission (Ziddah *et al.*, Unpublished Observations) showed that  
570 fish on some of the farms on Lake Volta were likely of imported GIFT strain origin (Ponzoni  
571 et al., 2011) or hybrids of GIFT and indigenous strains.

572 If farmers have been illegally sourcing broodstock from Asia and other areas, that would be  
573 an ideal method of translocating pathogens from one region to another. It should be noted  
574 though that ISKNV has also been detected in internationally traded freshwater ornamental  
575 species, theoretically posing another possible introduction route (Jung-Schroers et al., 2016)

576 It is very possible that this is not the first time disease introduction has taken place in Lake  
577 Volta Ghana. The study by (Verner-Jeffreys et al., 2018) showed that outbreaks of *S .*  
578 *agalactiae* investigated in 2016 were all caused by genetically indistinguishable isolates of

579 ST 261, with closest genetic identity to Asian isolates. Discussions with affected farmers at  
580 the time suggested, that *S. agalactiae* associated mortalities were a relatively recent  
581 phenomenon, although the disease is now clearly endemic to all the areas in the Volta area.  
582 Other studies have shown that *S. agalactiae* ST261 has likely been translocated around the  
583 world in association with farmed tilapia (Kawasaki et al., 2018). As a single large  
584 epidemiological unit, it will be difficult to control transmission of virus between farms on  
585 lake Volta. It is important to try to prevent spread from Lake Volta to surrounding  
586 watersheds and the wider African continent by control over movement of live fish and  
587 equipment. The development of biosecure offline hatcheries with borehole water or UV  
588 treatment of water, to facilitate production of juveniles which survive to a size they can be  
589 vaccinated will likely be key to vaccine control. Additionally, recent technological advances  
590 in rapid selective breeding (Houston et al., 2020; Robledo, Palaiokostas, Bargelloni,  
591 Martínez, & Houston, 2018) should be employed to develop ISKNV disease resistant  
592 populations, or strains of tilapia to enable the industry to recover.

593 Although most attention to date has focussed on the emergence and spread of TiLV within  
594 the tilapia industry world-wide, these results also demonstrate that there is a range of other  
595 potential threats to the sustainability of tilapia aquaculture.

## 596 **Conclusion**

597 This is the first report of Infectious Spleen and Kidney Necrosis Virus (ISKNV) in farmed  
598 tilapia in Africa. ISKNV was found in co-infection with *Streptococcus agalactiae* and other  
599 bacterial pathogens in Lake Volta, Ghana. The correlations seen between the mortality  
600 events, histopathology and viral loads in the tissues suggest that ISKNV was a major cause of  
601 mortalities during the outbreaks. In general, the results support continued efforts to improve  
602 the biosecurity of the industry in Ghana. There is a clear need to strengthen domestic

603 capability to rapidly diagnose and control emerging disease threats caused by ISKNV and  
604 other pathogens. Further work is also needed to map the distribution of the virus and its  
605 impact, including potential effects on wild fish species, and to implement practical control  
606 strategies.

## 607 **Acknowledgements**

608 The farmers involved in the investigation are thanked for their support and provision of  
609 information. Support from Defra (contracts FB002 and FX001 for the OIE Collaborating  
610 Centre for Emerging Aquatic Animal Diseases) is gratefully acknowledged.

## 611 **References**

### 612 **Data sharing**

613 **The data that support the findings of this study are openly available in BioRxiv doi:**  
614 **<https://doi.org/10.1101/680538>**

615 Abdelsalam, M., Asheg, A., & Eissa, A. E. (2013). Streptococcus dysgalactiae: An emerging  
616 pathogen of fishes and mammals. *International Journal of Veterinary Science and*  
617 *Medicine*, 1(1), 1–6. <https://doi.org/10.1016/j.ijvsm.2013.04.002>

618 Altschul, S. F., Madden, T. L., Schäffer, A. A., Zhang, J., Zhang, Z., Miller, W., & Lipman,  
619 D. J. (1997). Gapped BLAST and PSI-BLAST: A new generation of protein database  
620 search programs. *Nucleic Acids Research*, 25, 3389–3402.  
621 <https://doi.org/10.1093/nar/25.17.3389>

622 Delannoy, C. M., Crumlish, M., Fontaine, M. C., Pollock, J., Foster, G., Dagleish, M. P., ...  
623 Zadoks, R. N. (2013). Human Streptococcus agalactiae strains in aquatic mammals and  
624 fish. *BMC Microbiology*, 13(1), 41. <https://doi.org/10.1186/1471-2180-13-41>

- 625 Dong, Y., Weng, S., He, J., & Dong, C. (2013). Field trial tests of FKC vaccines against  
626 RSIV genotype Megalocytivirus in cage-cultured mandarin fish (*Siniperca chuatsi*) in an  
627 inland reservoir. *Fish and Shellfish Immunology*, 35, 1598–1603.  
628 <https://doi.org/10.1016/j.fsi.2013.09.005>
- 629 FAO. (2016). *The State of World Fisheries and Aquaculture. Contributing to food security*  
630 *and nutrition for all*. Rome.
- 631 FAO. (2018). *The State of World Fisheries and Aquaculture 2018 - Meeting the sustainable*  
632 *development goals*. <https://doi.org/978-92-5-130562-1>
- 633 Godoy, M. G., Aedo, A., Kibenge, M. J. T., Groman, D. B., Yason, C. V., Grothusen, H., ...  
634 Kibenge, F. S. B. (2008). First detection, isolation and molecular characterization of  
635 infectious salmon anaemia virus associated with clinical disease in farmed Atlantic  
636 salmon (*Salmo salar*) in Chile. *BMC Veterinary Research*, 4:28.  
637 <https://doi.org/10.1186/1746-6148-4-28>
- 638 Hounmanou, Y. M. G., Mdegela, R. H., Dougnon, T. V., Achoh, M. E., Mhongole, O. J.,  
639 Agadjihouèdé, H., ... Dalsgaard, A. (2018). Tilapia lake virus threatens tilapiines  
640 farming and food security: Socio-economic challenges and preventive measures in Sub-  
641 Saharan Africa. *Aquaculture*, 493, 123–129.  
642 <https://doi.org/10.1016/j.aquaculture.2018.05.001>
- 643 Houston, R. D., Jin, Y. H., Jenkins, T. L., Selly, S. L. C., Martin, S. A. M., Stevens, J. R., &  
644 Santos, E. M. (2020). Harnessing genomics to fast-track genetic improvement in  
645 aquaculture. *Nature Reviews Genetics*. <https://doi.org/10.1038/s41576-020-0227-y>
- 646 Jancovich, J. K., Chinchar, V. G., Hyatt, A., Miyazaki, T., Williams, T., & Zhang, Q. Y.  
647 (2012). Family Iridoviridae. In A. M. Q. King, M. J. Adams, E. B. Carstens, &



- 648 Lefkowitz. E.J. (Eds.), *Virus Taxonomy: Ninth Report of the International Committee on*  
649 *Taxonomy of Viruses*. (pp. 193–210). San Diego, CA: Elsevier Academic Press.
- 650 Jansen, M. D., Cudjoe, K., & Brun, E. (2018). *Investigation of tilapia mortality in Ghana*.
- 651 Jung-Schroers, V., Adamek, M., Wohlsein, P., Wolter, J., Wedekind, H., & Steinhagen, D.  
652 (2016). First outbreak of an infection with infectious spleen and kidney necrosis virus  
653 (ISKNV) in ornamental fish in Germany. *Diseases of Aquatic Organisms*, *119*, 239–244.  
654 <https://doi.org/10.3354/dao02995>
- 655 Kawasaki, M., Delamare-Deboutteville, J., Bowater, R. O., Walker, M. J., Beatson, S., Ben  
656 Zakour, N. L., & Barnes, A. C. (2018). Microevolution of *Streptococcus agalactiae* ST-  
657 261 from Australia Indicates Dissemination via Imported Tilapia and Ongoing  
658 Adaptation to Marine Hosts or Environment. *Applied and Environmental Microbiology*,  
659 *84*, e00859-1. <https://doi.org/10.1128/aem.00859-18>
- 660 Klindworth, A., Pruesse, E., Schweer, T., Peplies, J., Quast, C., Horn, M., & Glöckner, F. O.  
661 (2013). Evaluation of general 16S ribosomal RNA gene PCR primers for classical and  
662 next-generation sequencing-based diversity studies. *Nucleic Acids Research*, *41*(1), e1.  
663 <https://doi.org/10.1093/nar/gks808>
- 664 Kurita, J., Nakajima, K., Hirono, I., & Aoki, T. (1998). Polymerase chain reaction (PCR)  
665 amplification of DNA of red sea bream iridovirus (RSIV). *Fish Pathology*, *33*(1), 17–23.  
666 Retrieved from [http://www.scopus.com/inward/record.url?eid=2-s2.0-0032388179&partnerID=40&md5=3128c9b74c19de5bce885a2566e475a0%5Cnhttps://www.jstage.jst.go.jp/article/jsfp1966/33/1/33\\_1\\_17/\\_pdf](http://www.scopus.com/inward/record.url?eid=2-s2.0-0032388179&partnerID=40&md5=3128c9b74c19de5bce885a2566e475a0%5Cnhttps://www.jstage.jst.go.jp/article/jsfp1966/33/1/33_1_17/_pdf)
- 669 Kurita, Jun, & Nakajima, K. (2012). Megalocytiviruses. *Viruses*, *4*, 521–538.  
670 <https://doi.org/10.3390/v4040521>

- 671 Luo, X., Fu, X., Liao, G., Chang, O., Huang, Z., & Li, N. (2017). Isolation, pathogenicity and  
672 characterization of a novel bacterial pathogen *Streptococcus uberis* from diseased  
673 mandarin fish *Siniperca chuatsi*. *Microbial Pathogenesis*, *107*, 380–389.  
674 <https://doi.org/https://doi.org/10.1016/j.micpath.2017.03.049>
- 675 Machimbirike, V. I., Jansen, M. D., Senapin, S., Khunrae, P., Rattanarojpong, T., & Dong, H.  
676 T. (2019). Viral infections in tilapines: More than just tilapia lake virus. *Aquaculture*,  
677 *503*, 508–518. <https://doi.org/10.1016/j.aquaculture.2019.01.036>
- 678 Mardones, F. O., Martinez-Lopez, B., Valdes-Donoso, P., Carpenter, T. E., & Perez, A. M.  
679 (2014). The role of fish movements and the spread of infectious salmon anemia virus  
680 (ISAV) in Chile, 2007-2009. *Preventive Veterinary Medicine*, *114*(1), 37–46.  
681 <https://doi.org/10.1016/j.prevetmed.2014.01.012>
- 682 Nakajima, K., Maeno, Y., Honda, A., Yokoyama, K., Tooriyama, T., & Manabe, S. (1999).  
683 Effectiveness of a vaccine against red sea bream iridoviral disease in a field trial test.  
684 *Diseases of Aquatic Organisms*, *36*, 73–75. <https://doi.org/10.3354/dao036073>
- 685 Plumb, J. A., & Hanson, L. A. (2011). Tilapia bacterial diseases. In J. A. Plum & L. A.  
686 Hanson (Eds.), *Health Maintenance and Principle Microbial Diseases of Cultured*  
687 *Fishes*, *Third edition*. (pp. 445–463).  
688 <https://doi.org/https://doi.org/10.1002/9780470958353.ch16>
- 689 Ponzoni, R. W., Nguyen, N. H., Khaw, H. L., Hamzah, A., Bakar, K. R. A., & Yee, H. Y.  
690 (2011). Genetic improvement of Nile tilapia (*Oreochromis niloticus*) with special  
691 reference to the work conducted by the WorldFish Center with the GIFT strain. *Reviews*  
692 *in Aquaculture*, *3*(1), 27–41. <https://doi.org/doi:10.1111/j.1753-5131.2010.01041.x>
- 693 Rimmer, A. E., Becker, J. A., Tweedie, A., & Whittington, R. J. (2012). 2012 Development

- 694 of a quantitative polymerase chain reaction (qPCR) for the detection of dwarf gourami  
695 iridovirus (DGIV) and other Megalocytiviruses and comparison with the Office  
696 International des Epizooties reference PCR protocol. *Aquaculture* 358-359:15.  
697 *Aquaculture*, 358–359, 155–163.
- 698 Robledo, D., Palaiokostas, C., Bargelloni, L., Martínez, P., & Houston, R. (2018).  
699 Applications of genotyping by sequencing in aquaculture breeding and genetics.  
700 *Reviews in Aquaculture*, 10(3), 670–682. <https://doi.org/10.1111/raq.12193>
- 701 Shimmoto, H., Kawai, K., Ikawa, T., & Oshima, S. I. (2010). Protection of red sea bream  
702 *Pagrus major* against red sea bream iridovirus infection by vaccination with a  
703 recombinant viral protein. *Microbiology and Immunology*, 54, 135–142.  
704 <https://doi.org/10.1111/j.1348-0421.2010.00204.x>
- 705 Shoemaker, C. A., Xu, D. H., Garcia, J. C., & Lafrentz, B. R. (2017). Capsular typing of  
706 streptococcus agalactiae (Lancefield group B streptococci) from fish using multiplex  
707 PCR and serotyping. *Bulletin of the European Association of Fish Pathologists*, 37(5),  
708 190–197.
- 709 Subramaniam, K., Gotesman, M., Smith, C. E., Steckler, N. K., Kelley, K. L., Groff, J. M., &  
710 Waltzek, T. B. (2016). Megalocytivirus infection in cultured Nile tilapia *Oreochromis*  
711 *niloticus*. *Diseases of Aquatic Organisms*, 119(3), 253–258.  
712 <https://doi.org/10.3354/dao02985>
- 713 Subramaniam, K., Shariff, M., Omar, A. R., & Hair-Bejo, M. (2012). Megalocytivirus  
714 infection in fish. *Reviews in Aquaculture*, 4(4), 221–233. [https://doi.org/10.1111/j.1753-](https://doi.org/10.1111/j.1753-5131.2012.01075.x)  
715 [5131.2012.01075.x](https://doi.org/10.1111/j.1753-5131.2012.01075.x)
- 716 Suebsing, R., Pradeep, P. J., Jitrakorn, S., Sirithammajak, S., Kampeera, J., Turner, W. A., ...

- 717 Kiatpathomchai, W. (2016). Detection of natural infection of infectious spleen and  
718 kidney necrosis virus in farmed tilapia by hydroxynaphthol blue-loop-mediated  
719 isothermal amplification assay. *Journal of Applied Microbiology*, *121*(1), 55–67.  
720 <https://doi.org/10.1111/jam.13165>
- 721 Tamura, K., Stecher, G., Peterson, D., Filipski, A., & Kumar, S. (2013). MEGA6: Molecular  
722 Evolutionary Genetics Analysis version 6.0. *Molecular Biology and Evolution*, *30*(12),  
723 2725–2729. <https://doi.org/10.1093/molbev/mst197>
- 724 Verner-Jeffreys, D., Wallis, T., Cano, I., Ryder, D., Hayden, D., Domozoro, J., ... Feis, S.  
725 (2018). *Streptococcus agalactiae* Multi Locus Sequence Type 261 is associated with  
726 mortalities in the emerging Ghanaian tilapia industry. *Journal of Fish Diseases*, *41*,  
727 157–179. <https://doi.org/10.1111/jfd.12681>
- 728 Vike, S., Stian Nylund, S., & Nylund, A. (2009). ISA virus in Chile: evidence of vertical  
729 transmission. *Archives of Virology*, *154*, 1–8.
- 730 Whittington, R. J., Becker, J. A., & Dennis, M. M. (2010). Iridovirus infections in finfish-  
731 critical review with emphasis on ranaviruses. *Journal of Fish Diseases*, *33*(2), 95–122.  
732 <https://doi.org/10.1111/j.1365-2761.2009.01110.x>
- 733 World Organisation for Animal Health OIE. (2018). Chapter 2.3.8 Red sea bream iridoviral  
734 disease. In *Manual of Diagnostic Tests for Aquatic Animals*. Retrieved from  
735 <http://www.oie.int/en/standard-setting/aquatic-manual/access-online/>
- 736 Yáñez, M. A., Catalán, V., Apráiz, D., Figueras, M. J., & Martínez-Murcia, A. J. (2013).  
737 Phylogenetic analysis of members of the genus *Aeromonas* based on *gyrB* gene  
738 sequences. *International Journal of Systematic and Evolutionary Microbiology*, *53*,  
739 875–883.

740
